# 1 A novel high-accuracy genome assembly method utilizing a high-throughput workflow

2 Qingdong Zeng<sup>1,#</sup>, Wenjin Cao<sup>2,#</sup>, Liping Xing<sup>3,#</sup>, Guowei Qin<sup>2,#</sup>, Jianhui Wu<sup>1,#</sup>, Michael F.  
3 Nagle<sup>4</sup>, Qin Xiong<sup>5</sup>, Jinhui Chen<sup>5</sup>, Liming Yang<sup>5</sup>, Prasad Bajaj<sup>6</sup>, Annapurna Chitikineni<sup>6</sup>,  
4 Yan Zhou<sup>7</sup>, Yunxin Yu<sup>5</sup>, Jiang Xu<sup>8</sup>, Xiaojun Nie<sup>1</sup>, Lin Huang<sup>5</sup>, Shengjie Liu<sup>1</sup>, Jan Šafář<sup>9</sup>,  
5 Hana Šimková<sup>9</sup>, Weining Song<sup>1</sup>, Baozhu Guo<sup>10</sup>, Shilin Chen<sup>8</sup>, Jaroslav Doležel<sup>9</sup>, Zhaodong  
6 Hao<sup>5</sup>, Qiang Cheng<sup>5</sup>, Jianguo Liang<sup>11</sup>, Jiansong Tang<sup>11</sup>, Aizhong Cao<sup>3</sup>, Qiang Wang<sup>3</sup>,  
7 Xiangqian Lu<sup>3</sup>, Shouping Yang<sup>3</sup>, Hongxiang Ma<sup>12</sup>, Jiajie Liu<sup>1</sup>, Xiaoting Wang<sup>1</sup>, Hong  
8 Zhang<sup>1</sup>, Zhonghua Wang<sup>1</sup>, Wanquan Ji<sup>1</sup>, Changfa Wang<sup>1</sup>, Fengping Yuan<sup>1</sup>, Jisen Shi<sup>5,\*</sup>,  
9 Rajeev K. Varshney<sup>6,13,\*</sup>, Zhensheng Kang<sup>1,\*</sup>, Dejun Han<sup>1,\*</sup>, Haibin Xu<sup>5,\*</sup>

## 10 Affiliation:

- 11 1. State Key Laboratory of Crop Stress Biology for Arid Areas, Northwest A&F University,  
12 Yangling, Shaanxi 712100, China
- 13 2. Nanjing Hong-Yuan Biotechnology Company Limited, Nanjing, Jiangsu 210033, China
- 14 3. National Key Laboratory of Crop Genetics and Germplasm Enhancement, Nanjing  
15 Agricultural University/Jiangsu Collaborative Innovation Center for Modern Crop  
16 Production, Nanjing, Jiangsu 210095, China
- 17 4. Department of Forest Ecosystems and Society, Oregon State University, Corvallis, OR,  
18 97331, USA
- 19 5. Co-Innovation Center for Sustainable Forestry in Southern China, Nanjing Forestry  
20 University, Nanjing, Jiangsu 210037, China
- 21 6. Center of Excellence in Genomics & Systems Biology, International Crops Research  
22 Institute for the Semi-Arid Tropics (ICRISAT), Hyderabad, India
- 23 7. Department of Agronomy, Iowa State University, Ames, Iowa 50011, USA
- 24 8. Institute of Chinese Materia Medica, China Academy of Chinese Medical Sciences,  
25 Beijing 100700, China

- 26 9. Institute of Experimental Botany of the Czech Academy of Sciences, Centre of the  
27 Region Haná for Biotechnological and Agricultural Research, Šlechtitelů 31, CZ-779 00  
28 Olomouc, Czech Republic
- 29 10. USDA-ARS, Crop Genetics and Breeding Research Unit, Tifton, GA 31793, USA
- 30 11. Shenzhen Precision Health Information Technology Company Limited, Shenzhen,  
31 Guangdong 518000, China
- 32 12. Jiangsu Key Lab of Crop Genomic and Molecular Breeding/Jiangsu Co-Innovation  
33 Center of Modern Production Technology of Grain Crops, College of Agriculture,  
34 Yangzhou University, Yangzhou, Jiangsu 225009, China
- 35 13. The UWA Institute of Agriculture, The University of Western Australia, Perth, Australia

36

37 # These authors contributed equally to this work

38

39 \* For correspondence: Haibin Xu: [xuhaibin@njfu.edu.cn](mailto:xuhaibin@njfu.edu.cn)  
40 Dejun Han: [handj@nwafu.edu.cn](mailto:handj@nwafu.edu.cn)  
41 Zhensheng Kang: [kangzs@nwafu.edu.cn](mailto:kangzs@nwafu.edu.cn)  
42 Rajeev K. Varshney: [r.k.varshney@cgiar.org](mailto:r.k.varshney@cgiar.org)  
43 Jisen Shi: [jshi@njfu.edu.cn](mailto:jshi@njfu.edu.cn)

44

45

46 **Abstract**

47 Across domains of biological research using genome sequence data, high-quality  
48 reference genome sequences are essential for characterizing genetic variation and  
49 understanding the genetic basis of phenotypes. However, the construction of genome  
50 assemblies for various species is often hampered by complexities of genome organization,  
51 especially repetitive and complex sequences, leading to mis-assembly and missing regions.  
52 Here, we describe a high-throughput gold standard genome assembly workflow using a large-  
53 scale bacterial artificial chromosome (BAC) library with a refined two-step pooling strategy  
54 and the Lamp assembler algorithm. This strategy minimizes the laborious processes of  
55 physical map construction and clone-by-clone sequencing, enabling inexpensive sequencing  
56 of several thousand BAC clones. By applying this strategy with a minimum tiling path BAC  
57 clone library for the short arm of chromosome 2D (2DS) of bread wheat, 98% of BAC  
58 sequences, covering 92.7% of the 2DS chromosome, were assembled correctly for this  
59 species with a highly complex and repetitive genome. We also identified 48 large mis-  
60 assemblies in the reference wheat genome assembly (IWGSC RefSeq v1.0) and corrected  
61 these large mis-assemblies in addition to filling 92.2% of the gaps in RefSeq v1.0. Our 2DS  
62 assembly represents a new benchmark for the assembly of complex genomes with both high  
63 accuracy and efficiency.

64

## 65 Introduction

66 High-quality reference genome sequences are critical resources for the characterization  
67 of genomic structure and function, as well as the heritable phenotypes driven by underlying  
68 genomic variation. These resources are being applied in diverse areas of research, including  
69 genetic analysis<sup>1</sup>, crop improvement<sup>2</sup>, medical screening<sup>3</sup> and synthetic biology<sup>4</sup>. Therefore,  
70 the genomics research community is highly motivated in working towards the objective of  
71 developing high-quality genome sequences. In practice, due to the difficulties associated with  
72 obtaining a fully assembled, refined genome, it is feasible to achieve a nearly complete level  
73 of semi-contiguous assembly, with many genomic regions covered by a small number of  
74 contigs, but there remain gaps, mis-assemblies and masked regions of low sequence quality  
75 or with repetitive sequences<sup>5</sup>. Such sequences provide essential references that can be used  
76 for whole-genome comparison, evolutionary and phylogenetic analyses<sup>6,7</sup>, identifying natural  
77 variants or key genes<sup>8-11</sup>, and genome-wide transcriptome analysis<sup>12</sup>. However, the reliance  
78 on a single reference genome can result in the inability to identify large structural variations  
79 in different genetic backgrounds, such as insertions and duplications; accordingly, recent  
80 studies have attempted to overcome this limitation by comparing *de novo* assemblies of each  
81 genotype—a collection termed a “pan-genome”<sup>1,13,14</sup>.

82 With the invention of long-read sequencing technologies such as single-molecule real-  
83 time (SMRT) sequencing<sup>15</sup> and Nanopore sequencing<sup>16</sup>, the production of highly contiguous  
84 reference genomes for species with small genomes of relatively low complexity has become  
85 increasingly practical. However, there remain major challenges for species with large or  
86 complex genomes, such as those with repetitive sequences<sup>17</sup> and high-order polyploidy<sup>18</sup>,

87 including polyploids with a high degree of heterozygosity<sup>19,20</sup>. Long repetitive sequences are  
88 found in the genomes of almost all eukaryotes, especially species with large or polyploid  
89 genomes such as gymnosperms<sup>21</sup> and species of the Poaceae family<sup>22</sup>. The highly complex  
90 and repetitive nature of these genomes results from chromosomal structural variation due to  
91 unequal cross-over<sup>23</sup>, segment replication<sup>24</sup> and insertion of various transposable elements<sup>25</sup>,  
92 among other modes of recombination and mutation during the course of evolution. Such  
93 repetitive regions often result in mis-assembly and reduce the quality of the reference  
94 genome, thus adversely affecting the accuracy of subsequent resequencing and pan-genomic  
95 analysis in these regions<sup>26</sup>. Another example is the dikaryon or polykaryon genome  
96 characteristics of some basidiomycetes, in which two or more cell nuclei with similar  
97 genomes can coexist in a single cell, leading to difficulties in distinguishing genome-wide  
98 repeats and resolving sequences of all chromosome sets within a single strain<sup>27,28</sup>.

99 Mis-assembly is a common result of difficulties in assembling genome regions that are  
100 complex and repetitive. In a mis-assembly event, two or more contigs or scaffolds are  
101 erroneously joined when they in fact originate from non-adjacent positions, including  
102 positions on different chromosomes. For assemblies using short reads, mis-assembly often  
103 results from the discarding of contigs with short lengths. In contrast, for assemblies based on  
104 long reads alone or utilizing hybrid sequencing with both long and short reads, mis-assembly  
105 is more likely to result from errors or losses in overlap detection due to sequencing errors of  
106 long reads<sup>15,29</sup>. During the construction of scaffolds, mis-assembly can originate from  
107 incorrect connections that stem from a small proportion of weak, errant or conflicting lines of  
108 evidence from major long-range technologies, such as mate-pair sequencing<sup>30</sup>, Hi-C<sup>31</sup>, optical

109 mapping<sup>32</sup>, 10x genomics technology<sup>33</sup>, genetic maps, and bacterial artificial chromosome  
110 libraries (BAC libraries) or fosmid libraries, carrying a particularly high risk when  
111 connecting contigs with short lengths or incorrect structures. Following the initial assembly is  
112 often a stage of error correction, a highly complicated task in which corrections are made to  
113 as many mis-assemblies as practical, with direct costs and labour expenses far exceeding  
114 those of initial assembly<sup>34</sup>. Therefore, refinements in sequencing and assembly algorithms are  
115 essential prerequisites for reliable assembly of highly complex genomes<sup>35</sup>.

116 While next-generation shotgun sequencing methods are associated with a high risk of  
117 mis-assembly, this risk is reduced for “gold standard” assembly workflows using map-based  
118 approaches, including chromosome sorting<sup>36</sup>, BAC libraries, physical mapping<sup>37</sup>, and clone-  
119 by-clone sequencing, among others. These map-based approaches reduce the problem of  
120 genome assembly from the whole-genome scale to the scale of a BAC clone or another  
121 chromosomal fragment. Thus, regional reference sequences are produced and then used for  
122 either *de novo* assembly or error correction following whole-genome sequencing (WGS). By  
123 using this strategy, gold standard assemblies were successfully produced for several key  
124 species of major academic or economic value, including humans<sup>38</sup>, rice<sup>39</sup>, maize<sup>40</sup>, wheat<sup>41</sup>  
125 and *Arabidopsis*<sup>42</sup>. However, these gold standard approaches tend to be highly laborious and  
126 are often cost prohibitive, which severely limits their usage. An impressive example is the  
127 wheat reference sequence (RefSeq) v1.0, the product of 13 years of collaborative  
128 interdisciplinary research coordinated by the International Wheat Genome Sequencing  
129 Consortium (IWGSC), involving collaboration among over 200 scientists from 73 research  
130 institutes in 20 countries<sup>41</sup>. RefSeq v1.0 consists of over 15 giga base pairs (Gb) with over

131 85% of the genome consisting of repetitive sequences. While this accomplishment  
132 established a new precedent for the robust assembly of complex genomes, its quality is  
133 limited to the extent that the assembly still contains 522,751 gaps and 481 mega base pairs  
134 (Mb) of unanchored contigs in defined chromosome assemblies.

135 Here, we describe a workflow with innovations in pooled sequencing and assembly  
136 algorithms that enable highly robust and accurate assembly of reference sequences with  
137 reduced labour and material costs. We designed a scalable two-step system for pooling  
138 samples and hybrid sequencing, allowing sequencing data for hundreds or thousands of BAC  
139 clones to be easily obtained in a single experiment. We developed the Lamp assembler to  
140 process pooled short reads along with pooled long reads and produce a complete assembly  
141 for BAC clone sequences. To demonstrate the capacity of our workflow for assembly of  
142 complex genomes, we chose the short arm of wheat chromosome 2D (2DS) as a benchmark.  
143 Our workflow reduces the sequencing cost to less than \$10 per BAC clone and yields gapless  
144 assemblies for 98% of BACs. The contiguous 2DS contigs were produced with a contig N50  
145 size of 1.1 Mb. Our workflow significantly improves the sequence accuracy of the 2DS  
146 portion of RefSeq v1.0, as we detected and corrected at least 48 large mis-assemblies and  
147 filled 92.2% of 10,434 sequence gaps. We validated the accuracy of our 2DS assembly by  
148 chromosome anchoring experiments using nullisomic-tetrasomic wheat lines<sup>43</sup>, as well as  
149 Sanger sequencing. These results were confirmed further by comparison of survey sequences  
150 specific to chromosomes or arms<sup>44</sup>, whole-genome profiling (WGP) data and physical  
151 maps<sup>41</sup>. Our Lamp algorithm exhibits significant potential to be incorporated into a wide  
152 range of low-cost sequencing solutions for genome projects of bacteria, monokaryon and

153 dikaryon fungi and plant organelles, among other targets. In summary, our workflow is  
154 widely applicable across diverse species for the production of high-quality reference  
155 sequences.

## 156 **Results**

### 157 *Scalable two-step sample pooling design and the Lamp assembler algorithm*

158 We designed a two-step pooling system for high-throughput production and cross-  
159 referencing of short- and long-read data with multiplexed samples. Short reads were  
160 generated from the primary pools, which were further pooled to form “super pools” from  
161 which long reads were generated (Figure 1a, Materials and Methods). Primary pools from  
162 different types of samples are compatible within a super pool, thus providing throughput  
163 advantages and reducing per-sample sequencing costs while maximizing the flexibility of  
164 sample preparation for long-read sequencing. The pooling design reduced the sizes of  
165 sequencing libraries and did not require the sequencing barcodes that are commonly used to  
166 distinguish reads across primary pools or clones, which improved the platform-level  
167 flexibility of the pooling design and reduced the associated costs and labour.

168 Lamp is a *de novo* hybrid assembler algorithm designed to split long reads and assemble  
169 contigs using long reads as well as *k*-mers from short reads (Figure 1). The entire assembly  
170 process does not rely on reference genomes, physical maps, Hi-C data, optical maps, etc. It  
171 benefits from the dual advantages of long-read and short-read sequencing; high-accuracy  
172 short reads of sufficient coverage provide assurance of sequence integrity, while higher-order  
173 structural integrity is strengthened by long reads.



174 For each primary pool, Lamp constructs a *de Bruijn* graph<sup>45</sup> from 99-mers disassembled  
175 from short reads and subsequently generates three contig sets of varying lengths and  
176 accuracies, termed NODE, COTG and SCAF, respectively (Figure 1b and 1c, Materials and  
177 Methods). In short, NODE is a set of unitigs of the highest confidence because they are  
178 produced by greedy extension—for any given extension, there is only a single candidate. The  
179 unitigs in NODE are 99 base pairs (bp) of minimum length, with a maximum of 98 bp  
180 overlap between unitigs. COTG is generated by extension of NODE. COTG construction  
181 begins with extension of each unitig along the *de Bruijn* graph, on both the 5' and 3' ends,  
182 until a dead end or a forward fork is reached. COTG has a structural accuracy comparable to  
183 that of NODE while featuring greater contig and overlap lengths. SCAF is produced by  
184 extension of gap-filled read pairs. For each given read pair, the *de Bruijn* graph was traversed  
185 to identify all candidate extension paths that could fill the inner gap. When such a candidate  
186 or candidates were found, one or more corresponding filled chains of unitigs were produced.  
187 Lamp next applies a step-by-step extension to fill chains on both ends, detecting and utilizing  
188 their overlaps to select candidates of the longest overlap length at each step, ultimately  
189 producing SCAF contigs. SCAF contigs feature sequences of greater average length than  
190 NODE and COTG and with reduced confidence relative to the other two contig sets.

191 To determine the primary pool from which each long read originates, Lamp compares  
192 alignments of a given long read against all SCAF contigs produced from the corresponding  
193 primary pools and makes a judgement based on the total length of retained alignments after  
194 removing false positives (Figure 1d, Materials and Methods). For a given primary pool,  
195 Lamp uses each long read as a reference axis and generates a connection chain of aligned

196 unitigs. For each aligned unitig, Lamp records the order, orientation and distance from  
197 adjacent unitigs (Figure 1e). SCAF is the first contig set to be aligned to the long reads  
198 because the length superiority of SCAF provides an advantage for the rate of successful  
199 alignment of short unitigs to long reads. The initial alignments are next transformed to  
200 substitute SCAF for COTG, thus avoiding the influence of structural issues in SCAF. Lamp  
201 sequentially compares each alignment to a given portion of the long read and then removes  
202 alignments or portions deemed likely to be false positives based on identity percentages and  
203 the number of base mismatches. The initial unitig chain is obtained after the alignments are  
204 further converted to NODE-based alignments. Lamp again traverses the *de Bruijn* graph to  
205 find all extension path candidates that may fill the gaps in the chain and selects the optimal  
206 candidate based on comparison to long reads and generates long-read chains.

207       Lamp uses a greedy extension strategy<sup>46</sup> to assemble genome sequences for each primary  
208 pool (Figure 1f). At the beginning of each extension loop, a non-repetitive unitig that is  
209 manually selected based on its length, coverage and forked interruption from a trial extension  
210 is used as the seed for extension. Repetitive unitigs are discarded when detected based on the  
211 frequent occurrence of conflicts during extension. Long-read chains in which a given seed is  
212 included are extracted, aligned using the seed as the origin, and extended to produce the  
213 genome chains of unitigs. When two or more extension path candidates appear, the extension  
214 pauses and then continues after manual judgement to select the most appropriate candidate.  
215 Upon completion of extension, a terminal unitig or sub-chain is manually selected as a new  
216 seed to begin the next extension cycle. The loop is terminated upon reaching a telomere or  
217 BAC vector sequence or when the chain cannot be extended further. During BAC sequence

218 assembly, Lamp checks for consistency between the sequence's two terminal sub-chains and  
219 sub-chains at both ends of the vector in the long-read chains. Finally, gaps in the genome  
220 chain are filled using the self-corrected consensus sequence of long reads, producing the final  
221 genome sequence.

## 222 *Contiguous assembly and chromosome anchoring*

223 For validation of our approach, we applied the two-step BAC pooling strategy to  
224 assemble contig sequences of the 2DS of the wheat cultivar Chinese Spring using the  
225 minimum tiling path (MTP) BAC library named TaaCsp2DSMTP. This MTP library  
226 comprises 3,025 BAC clones stored in eight 384-well plates and is a subset of the library  
227 TaaCsp2DShA (43,008 BAC clones with an estimated average insert size of 132 kilobases  
228 (kb)) used for WGP analysis (Figure s1a, Material s8)<sup>47</sup>. The 2DS WGP tags were previously  
229 used for the assembly of RefSeq v1.0<sup>41</sup>. In this work, a total of 60 primary pools were  
230 prepared for sequencing, each containing approximately 50 clones (Figure 1a, Table s1,  
231 Materials and Methods).

232 With the Lamp assembler, a total of 2,970 vector-to-vector BAC sequences were  
233 assembled to a gapless sequence (Table s2, Figure s1b, Materials s1, s2 and s3). The BAC  
234 sequences were 454.6 Mb in total length, with an average length of 153 kb and GC content of  
235 46.5%, covering approximately 98% of the MTP clones (Table 1). Assembly could not be  
236 completed for some clones due to insufficient raw data resulting from *Escherichia coli*  
237 culture-related issues or due to structural complexity that exceeded the capabilities of the  
238 Lamp algorithm. We noticed that the lengths of wheat genomic sequences inserted in the

239 vector differed among the primary pools (Table s1 and s3, Figure s2a), which is consistent  
240 with the source library being composed of two fractions with different insert sizes (Figure  
241 s2b, Material s8). We observed apparent plasmid replication errors mediated by the *E. coli*  
242 host. An example is the clone corresponding to the BAC\_2\_51 sequence, in which deletion of  
243 the 4,322-51,989 bp portion is supported by our long and short reads (Figure s3). The BAC  
244 sequences were further assembled to produce 458 contig sequences, with a total length of  
245 271.4 Mb, average length of 593 kb and N50 length of 1.0 Mb (Table 1 and s4, Material s4).  
246 A total of 308 contigs were composed of two or more BAC sequences, while 150 contigs  
247 were derived from a single BAC sequence (Table s5). Three chimeric BACs were detected  
248 during contig assembly (Figure s4).

249 The anchoring of contigs to chromosomes was determined by counting the lengths of  
250 each contig's exact matches of at least 300 bp to the genomic survey sequences of all wheat  
251 chromosomes or arms (Table 1, s6 and s7). The results show that 329 out of the 458  
252 assembled contigs with a total length of 248.9 Mb were anchored to the 2DS, while the N50  
253 length increased to 1.1 Mb, and 290 contigs (88.1% of total contigs) originated from 2 or  
254 more BAC sequences. A set of 129 contigs with a total length of 22.5 Mb were scattered  
255 across genomic regions outside 2DS, including 111 (86.0%) assembled from one BAC  
256 sequence for each. These non-2DS contaminants were found in 169 BAC sequences,  
257 accounting for 5.7% of the assembled BACs. The locations of two contigs were particularly  
258 unclear. The first was the G\_52\_2 contig (128 kb), suspected to be located on the 2DS but  
259 with a similar match to the 2BL arm. The other was the G\_519 contig (167 kb), located on a  
260 non-2DS contig with sequences matching both the 1BL and 5BL arms.

261 The chromosomal locations of non-2D contigs were verified by anchoring experiments  
262 using the nullisomic-tetrasomic lines of Chinese Spring wheat<sup>43,48</sup>. Of 129 non-2DS contigs,  
263 78 were anchored to the predicted chromosomes other than 2DS (Table s24, Figure s10).  
264 Failure to anchor for the remainder of the contigs may be attributable to weak specificity of  
265 primers (Figure s11). The anchoring results were further confirmed by comparison to RefSeq  
266 v1.0, and simultaneously, the exact positions of contigs in the chromosome assembly were  
267 obtained (Table s8). Out of 329 2DS contigs, 326 could be accurately anchored to the 2D  
268 chromosome assembly, while the locations of the T48, G\_52\_2 and G\_528 contigs were  
269 undetermined. Two BAC sequences were found to be chimeric in this step, located at the  
270 ends of the G\_185 and G\_362\_2 contigs, respectively (Table s5). At the chromosome level,  
271 the intervals covered by these contigs were distributed in the 0-268.0 Mb region of the 2D  
272 chromosome assembly, overlapping with the centromere region (264.4-272.5 Mb)  
273 determined by CENH3 ChIP-seq analysis<sup>41</sup>. In total, 92.7% of the 2DS assembly was covered  
274 by these assembled contigs (Table 1). This proportion is comparable to that in the 7DL  
275 physical map (92%) and greater than that in the 3B physical map (82%)<sup>49,50</sup>. In addition, the  
276 contigs scattered across other genomic regions were all anchored accurately to the  
277 appropriate chromosome assemblies.

#### 278 *Comparison of Lamp assembly results with the WGP tags and the physical map*

279 Since each primary pool was pooled from known MTP clones, we assessed the  
280 correspondence between publicly available MTP clones and our assembled BAC sequences  
281 by matching these clones' WGP tags to our BAC sequences according to their well positions  
282 in the plates received from CNRGV (Table s9). We first compared the MTP clones and our

283 BAC sequences that originated from the same plate wells. The WGP tags were matched to  
284 1,513, 1,011, and 446 BAC sequences with 100%, 99%~80%, and less than 80% tags  
285 matched to MTP clones, respectively (Figure s5). From the sequences with less than 80%  
286 MTP tag matching, we found that eight pairs (15 BACs in total) could be matched to the  
287 same MTP clone for each member of the pair (Table s10). As an example, for the 46 WGP  
288 tags of the MTP clone DS.H059.M09 located in well I1 of plate No. 5, 19 and the remaining  
289 27 tags were matched to BAC\_37\_34 and BAC\_37\_40, respectively. This is highly likely due  
290 to the original plate well containing the MTP clone having two different clones without  
291 overlaps. Taken together, the results show that corresponding clones were identified for 2,539  
292 BAC sequences (85.5% of BAC sequences) (Table s9, Materials and Methods). In particular,  
293 among the five chimeric BAC sequences discovered during assembly as previously  
294 mentioned, all the sequences matched a unique clone for which all WGP tags could be  
295 retrieved, thus indicating that the chimeric status was not a result of mis-assembly during our  
296 workflow.

297       Considering that our BAC samples were pooled from the exact same plates of MTP  
298 clones from CNRGV (Materials and Methods), the low matching rates for the remaining 431  
299 BAC sequences (terms unmatched BAC sequences) can presumably be attributed to cross-  
300 contamination in the MTP clone plates during clone selection. Notably, 413 out of 431  
301 unmatched BAC sequences were concentrated among 24 primary pools: Nos. 17-24 and 41-  
302 56, corresponding to plate Nos. 3, 6 and 7 (Table s1 and s9). Accordingly, 422 of the 436  
303 unmatched BAC clones on plate Nos. 3, 6 and 7 were selected from plate Nos. 25-32 and 81-  
304 88 of the source library (with a total of 112 plates) (Figure s1 and s6, Material s8). A total of

305 305 unmatched BAC sequences were re-anchored to the physical map with the assistance of  
306 adjacent BAC sequences in contigs (Figure s7a). Among these sequences, only 11 (3.6%)  
307 appear to overlap in position with BAC clones of the same primary pool for each primary  
308 pool in the physical map (Table s11, Figure s7b), further indicating the unmatched status of  
309 the remaining BAC sequences. When we tried to expand the matching range to all 3,025  
310 MTP clones, 294 (68.2%) BAC sequences remained for which no match was identified using  
311 an 80% matching rate with tags as the threshold (Table s12 and s13, Figure s8), suggesting  
312 that the problem of unmatched sequences was not attributable to primary pool design and  
313 handling. As we attempted to expand the range to all 37,635 BAC clones with WGP tags in  
314 the source library, matching candidates were detected for all but 16 (3.7%) BAC sequences  
315 (Table s12 and s14, Figure s8), confirming that the problem was not due to errors caused by  
316 the Lamp algorithm. Moreover, the matching rates for plate Nos. 1, 2, 4, 5 and 8 were not  
317 unexpectedly low. The above results further support the robustness of our BAC sequence  
318 assembly.

319 Structural conformity to the physical map was evaluated using 199 contig sequences,  
320 each containing at least 5 MTP clones corresponding to unique BAC sequences (Table s15  
321 and s16). A total of 183 contig sequences could be anchored to particular continuous physical  
322 map regions, providing validation for assembly in these regions. Each of the remaining 16  
323 contig sequences corresponded to at least two physical map regions, a result mainly  
324 attributable to the Lamp algorithm's accurate detection of missing or erroneous overlaps in  
325 the physical map (Figure 2a). For example, the T2 contig sequence, with a length of 2,089 kb,  
326 matched the ctg63 and ctg27 contigs in the physical map at the 1-1,051 kb and 1,043-2,089

327 kb regions, respectively. The sequences BAC\_9\_48 and BAC\_5\_12, corresponding to clones  
328 DS.H014.P24 and DS.H006.L03, were found to overlap with a length of 7.6 kb at the  
329 junction position (1,043-1,051 kb), although this overlap is not represented in the physical  
330 map.

331 Because the clones used to construct the physical map were not used to build RefSeq  
332 v1.0<sup>41</sup>, we then compared the consistency between the physical map and the RefSeq v1.0  
333 assembly by making use of all contig sequences that overlapped at any given region in the  
334 continuous physical map (327 contig sequences in total). The results generally show  
335 agreement between sequences (Table s17). Notably, the unanchored T48 contig sequence  
336 (351 kb) was located in the ctg118 physical map contig between the T45 and G\_132 contig  
337 sequences; thus, T48 was preliminarily anchored in the 20,795-20,833 kb (38 kb) region in  
338 the 2D chromosome assembly (Figure 2b, Material s6), suggesting potential for the Lamp  
339 assembler to resolve large mis-assemblies. Furthermore, a conflict was detected in the ctg71  
340 physical map contig, in which two contig sequences mapped to chromosome 1B, but their  
341 distance from one another in RefSeq v1.0 reached 109 Mb.

#### 342 *Revisions of large mis-assemblies and gaps in the IWGSC RefSeq v1.0*

343 Our comparison revealed overall structural consistency between RefSeq v1.0 and our  
344 assembled contig sequences, further proving the reliability of our workflow (Figure 3).  
345 Despite this trend of general consistency, we detected 43 large structural inconsistencies on  
346 the 2DS assembly with interval lengths exceeding 20 kb, indicating the presence of large mis-  
347 assemblies in RefSeq v1.0 (Table s18 and Figure s9). This included 38 insertions, two



348 deletions, and three inversions relative to RefSeq v1.0. These insertions involved contig  
349 portions of 3.9 Mb in total, with the largest interval at 602 kb (Figure 3). Deletions were  
350 found for two intervals of the RefSeq, with lengths of 506 kb and 82 kb. Among the three  
351 inversions, var\_13 and var\_36 were near the telomere, and var\_21 was near the centromere.  
352 We also detected seven large structural differences on non-2DS contigs, including three  
353 insertions, one deletion, one local translocation and two large translocations relative to  
354 RefSeq v1.0 (Table s18 and Figure s9). We speculate that the two large translocations may be  
355 false positives resulting from chimeric clones, although this possibility remains  
356 uninvestigated. We attempted to predict gene models in these insertions (Table s19 and  
357 Material s5); a total of 292 putative genes were annotated, including *evm.model.T20.9*, which  
358 may encode a disease resistance-related protein, indicating that chromosomes assembled in  
359 RefSeq v1.0 may exclude some genes affecting key agronomic traits.

360 Two independent experimental validations were conducted for these 2DS insertions.  
361 Twenty-seven allele-specific markers were designed using sequences from 38 2DS insertions.  
362 Thirteen of these 27 markers were successfully mapped to 2DS using the nullisomic-  
363 tetrasomic wheat lines as previously described (Table s24, Figure s10 and s11). To  
364 investigate the sequence and structural accuracy of mis-assembly corrections, we verified 39  
365 boundaries of large mis-assemblies in 2DS by PCR amplification coupled with Sanger  
366 sequencing (Table s25, Figure s12 and s13). These two approaches together validated 29 out  
367 of the 38 2DS insertions. Using matching thresholds of 3 kb and 99% similarity, matching  
368 portions were detected for 34 out of all 41 insertions in the unanchored sequences (chrUN) of  
369 the RefSeq (Table s20 and s21). This finding suggests that inaccurate anchoring of some

370 contigs led to exclusion of these contigs from chromosomes in RefSeq v1.0. The reliability of  
371 our workflow was further indicated by investigation of sequences exactly matched by  
372 insertions in any of the chromosome survey sequences, with chromosome anchoring of all  
373 insertions confirmed, with two exceptions, namely var\_33 (22 kb) and var\_35 (22 kb) (Table  
374 s22 and s23). Notably, many survey sequences that exactly match 2DS insertions appear in  
375 the chromosome arms 1BS, 2BL and 6AS, with frequencies of occurrence markedly higher  
376 than those for other chromosomes or arms. In particular, chromosome survey sequences  
377 exactly matching var\_28 can be found in all chromosomes or arms. Considered together,  
378 these multiple lines of evidence suggest that long repetitive regions featuring similar  
379 sequences in different chromosomes were the primary cause of inaccurate anchoring during  
380 the RefSeq v1.0 assembly process.

381       Of the 10,434 inner gaps represented by ‘N’ in 2DS of RefSeq v1.0, 9,621 gaps were  
382 covered by our contig sequences and could be filled after integration of the RefSeq with our  
383 results, while only 813 gaps remained unfilled (Table 1). The 92.2% filling rate is  
384 comparable to the 92.7% coverage rate of contigs on 2DS, suggesting that the inability to fill  
385 the remaining gaps is mainly a result of incomplete coverage of relevant genome portions by  
386 the MTP library. Therefore, WGP tags may be used for further screening and sequencing of  
387 BAC clones spanning the uncovered regions, likely reducing the number of gaps in the 2DS  
388 assembly to below 100. As a by-product of our 2DS assembly, 827 gaps of non-2DS regions  
389 were covered by assembled non-2DS contigs and could also be filled during integration.

390

391 **Discussion**

392 In this paper, we report the development of a high-throughput pooling methodology and  
393 the Lamp assembler algorithm and demonstrate the combined use of these methods for a gold  
394 standard assembly workflow applied to the 2DS of wheat. These advances contribute towards  
395 the goal of producing reference sequences for large and/or complex genomes at low cost,  
396 conserving labour costs for sample preparation and sequencing by taking advantage of  
397 pooling and hybrid sequencing. The average cost per BAC clone was below \$10 for the 2DS  
398 MTP library used as a benchmark; furthermore, this cost can be reduced to less than \$5 by  
399 making use of newer sequencing platforms. Ongoing reductions in sequencing costs will help  
400 to overcome cost as a limitation for widespread use of our workflow, in turn mitigating a  
401 major obstacle in producing gapless assemblies of very high coverage (>99%) from BAC  
402 clones. Therefore, our workflow will become increasingly accessible and valuable as gold  
403 standard genome workflows are used for an increasing number of accessions, with increasing  
404 demand for high accuracy and cost-efficiency<sup>51</sup>.

405 The tedious and time-consuming process of constructing physical maps is altogether  
406 avoided in our workflow since knowledge of BAC overlaps is not needed for pooling design  
407 or sequence assembly<sup>52</sup>. Even in the absence of physical map construction, the Lamp  
408 assembler is able to produce vector-to-vector gapless assemblies for 98% or more of BAC  
409 clones by enabling contig assembly using overlaps of BAC sequences alone. Our benchmark  
410 assembly using 2DS of wheat demonstrates that these advantages apply even to complex  
411 genomes. In our benchmark assembly, 2,970 BAC sequences from the wheat 2DS MTP  
412 library were assembled into 458 chromosome-scale contigs. The pooling design developed

413 for this workflow offers flexibility as samples may be added or excluded in response to  
414 results from sequencing; for example, a primary pool that fails to yield reads during  
415 sequencing of a corresponding super pool (due to reagent failure or other issues) may later be  
416 sequenced as part of a subsequent super pool. In practice, a highly practical approach to  
417 building primary pools is to group clones from adjacent wells on a given library plate. Clones  
418 from different samples can be combined and subsequently divided following assembly. For  
419 challenging steps of assembly, the Lamp algorithm can reduce the occurrence of mis-  
420 assembly by allowing real-time manual judgement. Compared to popular workflows,  
421 including those with labour-intensive correction processes as well as black-box style full-  
422 automatic assembly tools such as Canu, FALCON, MaSuRCA, DeNovoMagic and  
423 TRITEX<sup>41,53-56</sup>, our workflow demands the lowest total costs for the processes of sequencing,  
424 assembly and error correction (Material s7). Upon completion of contig assembly, the final  
425 reference sequence can be easily generated by integrating data from long-range technologies  
426 such as Hi-C, optical mapping and genetic mapping.

427 We evaluated the accuracy of our workflow using a benchmark of 2DS of wheat, which  
428 has proven highly difficult to assemble at reference quality using WGS data alone<sup>41,57-59</sup>. As  
429 wheat is a key staple crop of global importance, improvements to the reference sequence may  
430 lead to major agronomic benefits by advancing the characterization and improvement of  
431 agronomically important traits such as yield and pest resistance. Our workflow enables the  
432 complete correction of at least 48 large mis-assemblies in IWGSC RefSeq v1.0. Notably, in  
433 accordance with a pre-publication data sharing agreement following the Toronto International  
434 Data Release Workshop standard, only five of these are revised completely in RefSeq v2.0

435 (Material s6). Although the assembly coverage was limited to 92.7%, constrained mainly by  
436 limited coverage of the MTP library, the number of gaps in 2DS RefSeq v1.0 was  
437 nevertheless reduced from 10,434 to 813. Corrections of these large mis-assemblies and gaps  
438 may improve the continuity and structural accuracy of 2DS assembly to such an extent that  
439 2DS becomes the portion of IWGSC RefSeq closest to a gapless and complete assembly. Our  
440 workflow can be applied to any available chromosome-specific BAC and/or MTP library to  
441 fill gaps and correct mis-assembly throughout IWGSC RefSeq. Moreover, the detection of  
442 inconsistencies between WGP tags and the corresponding clones in the MTP library, as well  
443 as of errant or missing connections in the physical map, can help prevent introduction of  
444 these artefacts into subsequent studies. Overall, our workflow provides a low-cost, gold  
445 standard reference-quality assembly solution that can be applied feasibly not only to improve  
446 IWGSC RefSeq but also to produce new reference sequences for additional accessions of  
447 wheat or other species with highly complex genomes (Material s7).

448 The Lamp assembler provides capabilities to develop reference genome assemblies for  
449 various species and library types with reduced costs, offering flexibility in the design of an  
450 appropriate experimental workflow (Material s7). For separation of long reads mixed in a  
451 given super pool, Lamp offers a scalable and flexible ability to utilize short reads of each  
452 primary pool rather than sequencing barcodes. Moreover, in addition to the uses of the Lamp  
453 assembler for highly complex genomes, the system is generalizable for applications involving  
454 pooled samples sourced from multiple genomes of lower complexity. For example, a super  
455 pool may be produced by combining samples from dozens of bacterial strains or several  
456 fungal strains or from a mixture of BAC clones, viruses, bacteria, fungi, and plants in

457 proportions corresponding to for the desired sequence coverage. In the case of small  
458 genomes, such as those of most fungal and bacterial accessions, Lamp is capable of  
459 completing a genome assembly using WGS data alone. As an example of a genome meeting  
460 these criteria of low complexity, the non-contiguous assembled genome of the dikaryon  
461 *Rhizoctonia cerealis* AG-DI strain consists of 16 pairs of chromosomes, in addition to a  
462 circular mitochondrial genome, with a total length of 83.4 Mb, and the various nuclei of the  
463 organism vary in their respective genomes to a low extent<sup>60</sup>. For slightly larger genomes,  
464 such as those of Arabidopsis and rice, Lamp can first use WGS data to produce contigs for a  
465 *de novo* reference assembly and then integrate data from BAC sequencing to fill remaining  
466 gaps. Finally, the Lamp assembler also offers improvements to reliability in assembling  
467 genomes from samples with a high level of contamination, for example, genomes from  
468 viruses, biotrophic bacteria and fungi, chloroplasts, mitochondria and low-copy plasmids,  
469 thus objectively reducing the labour and material costs needed to obtain samples of adequate  
470 volume and purity.

## 471 **Conclusion**

472 In summary, we developed a low-cost genome assembly workflow based on a two-step  
473 pooling design and the Lamp assembler. Our application of this workflow significantly  
474 improved the continuity and accuracy of the 2DS of wheat in IWGSC RefSeq and  
475 furthermore established this genome portion as a benchmark for studying the assembly of  
476 complex genomes. The Lamp assembler itself is flexible and widely applicable for the  
477 assembly of genomes from diverse samples. By providing a means of assembling gold  
478 standard reference genomes with improved accuracy and reduced costs, our workflow

479 accelerates the generation of reference genomes, in turn contributing to robust  
480 characterization of genomic variation and the resulting effects on traits.

## 481 **Materials and Methods**

### 482 *MTP BAC library and bioinformatics data*

483 The MTP BAC library TaaCsp2DSMTP from the *Triticum aestivum* cv. Chinese Spring  
484 chromosome arm 2DS was obtained from the French Plant Genomic Resources Centre,  
485 CNRGV (<https://cnrgv.toulouse.inrae.fr/en/Library/Wheat>). The MTP was assembled from  
486 the 2DS BAC library TaaCsp2DSHA (Material s8) after WGP analysis<sup>41</sup> and consists of  
487 3,025 clones in eight 384-well plates (Table s1). The IWGSC RefSeq v1.0 wheat genome  
488 assembly and annotation, chromosome survey sequences<sup>44</sup>, WGP tags and 2DS physical map  
489 were accessed from the IWGSC sequence repository at the Unité de Recherches en  
490 Génomique Info (URGI, <https://wheat-urgi.versailles.inra.fr/Seq-Repository>). The Triticeae  
491 repeat sequence database (TREP) was accessed from GrainGenes  
492 (<https://wheat.pw.usda.gov/>).

### 493 *MTP BAC pooling and sequencing*

494 The 2DS MTP clones were mixed into primary pools according to their positions on the  
495 384-well plates received from CNRGV, with the exception of clones showing significant  
496 overlaps in the 2DS physical map, which were reassigned to simulate the fact that  
497 neighbouring clones in BAC libraries usually feature relatively little overlap. Each primary  
498 pool comprised 49-52 clones (recorded in Table s1). Prior to pooling, each clone was used  
499 individually to inoculate 13 mL of Luria-Bertani broth medium<sup>61</sup> containing 12.5 µg/mL

500 chloramphenicol in a 50 mL conical flask. Liquid cultures were incubated overnight at 37 °C  
501 and 225 rpm. Subsequently, the optical density (OD) at 600 nm of each culture was measured  
502 by a NanoDrop One<sup>C</sup> (ThermoFisher, USA), and cultures were combined into primary pools  
503 in volumes calculated such that pools had an equal concentration of each clone.

504 BAC clones were extracted from each of these primary pools using either the Qiagen  
505 Large-construct Kit (10) (12462, Qiagen, Germany) or Omega BAC/PAC DNA Maxi Kit  
506 (D2154-02, Omega, China). For both kits, we followed the manufacturer's standard  
507 instructions in the provided protocols. These protocols both begin with centrifugation of  
508 cells, resuspension of the pellet in a provided buffer and lysis of cells with an alkaline lysate  
509 solution. In the Qiagen protocol, isopropanol is added to the lysate to precipitate DNA,  
510 followed by an exonuclease treatment to digest chromosomal DNA. Next, the digested  
511 preparations are added to spin-columns, which are centrifuged to collect DNA in binding  
512 resin. The resin is washed by the addition of wash buffer to the resin and subsequent  
513 centrifugation, and finally, DNA is eluted by centrifugation of columns with elution buffer  
514 and collection of the eluent. The Omega protocol differs most notably in that DNA is  
515 collected by centrifugation without exonuclease treatment.

516 The resulting plasmid DNA samples were assayed using a Qubit<sup>®</sup> Fluorometer 3  
517 (ThermoFisher, USA) according to the protocol for the Qubit<sup>™</sup> dsDNA HS Assay Kit  
518 (Q32851, ThermoFisher, USA). Each super pool was prepared by mixing up to 10 primary  
519 pools with respect to their concentrations to produce equal mixtures.



520 From each primary pool, an Illumina paired-end (PE) sequencing library was constructed  
521 with an average insert size of 350 bp. Libraries were sequenced using the Illumina HiSeq X  
522 Ten sequencing platform, producing approximately 15 Gb of 150-bp PE short reads. The  
523 throughput was further increased to as much as 40 Gb to ensure that approximately 15 Gb of  
524 short reads was produced from the BAC plasmids, with the remainder attributable to  
525 contaminants such as the *E. coli* chromosome. Library preparation and sequencing were  
526 performed by Novogene Co., Ltd.

527 For each super pool, a PacBio sequencing library was constructed with an average insert  
528 size of 10 kb or 20 kb. Long-read data sequencing was performed using the PacBio Sequel  
529 sequencing system. Library preparation and sequencing were performed at Tianjin Biochip  
530 Co., Ltd., or Novogene Co., Ltd. In cases where long reads of a primary pool totaled less than  
531 300 Mb in size after being split in downstream methods as described below, additional long  
532 reads were further produced by appending the primary pool to another super pool.

### 533 *NODE contigs*

534 PE short reads for each primary pool were end-trimmed to reduce sequences to high-  
535 confidence sequences of no more than 125 bp. Pairing was disregarded, and PE short reads  
536 were considered independently from one another for the purpose of constructing NODE  
537 contigs. To generate initial contigs from these reads, we used Velvet (version 1.2.10) with the  
538 parameter ‘*k*-mer length = 99’ to build *de Bruijn* graphs<sup>45</sup>. Subsequently, we disassembled all  
539 end-trimmed reads into 99-bp *k*-mers and built a collection of *k*-mers that were not included  
540 in initial contigs but had a coverage of 5× or more; these *k*-mers are referred to as “inter-

541 contig  $k$ -mers.” As the end-trimmed reads had a maximum length of 125 bp, the disassembly  
542 of each produced up to 27 99-bp inter-contig  $k$ -mers. Initial contigs were also disassembled  
543 into 99-mers (termed intra-contig 99-mers), with their positions in the contigs noted. Finally,  
544 we built a hash table containing inter-contig 99-mers, intra-contig 99-mers, and the positions  
545 of the latter in initial contigs.

546 Next, we sought to build connections between 99-mers by identifying cases in which one  
547 of each originated from the same end-trimmed read. The hash table was searched according  
548 to the position order of 99-mers in each end-trimmed read to reveal 99-mer pairs overlapping  
549 in all but a terminal base for 98 bp of overlap. In cases where these pairs consist of both inter-  
550 contig and intra-contig 99-mers or two inter-contig 99-mers, a connection chain was  
551 recorded, with data including the sequences of each overlapping 99-mer, along with their  
552 relative orders, directions and overlaps.

553 To produce additional high-confidence connections, we constructed connection graphs  
554 by using initial contigs and inter-contig 99-mers as vertices and greedily extending inter-  
555 contig 99-mer vertices along both forward and reverse orientations using end-trimmed reads,  
556 accepting extensions meeting a threshold signal-to-noise ratio of 50:1. Extensions were  
557 terminated upon encountering a fork vertex, a dead end, an initial contig or a previously  
558 processed inter-contig 99-mer. Ultimately, the NODE contig set consisted of these extended  
559 contigs and initial contigs.

560

561

562 *Short-read- and paired-read-based connection chains*

563 While NODE contigs are assembled using end-trimmed reads processed without regard  
564 to pairing and the trimmed portion, the construction of SCAF and COTG contigs requires  
565 connection chains built from paired reads. For each PE read pair, the correspondence of each  
566 read to NODE contigs was assessed by searching for matches in a hash table of 99-mers  
567 disassembled from NODE contigs, similar to the hash table process used during NODE  
568 contig construction. At this stage, reads found to match NODE contigs may either map to  
569 internal sequences of NODEs or to their edges; in the latter case, this extension leads to  
570 connection chains among NODEs, termed initial short-read-based connection chains (SR  
571 chains).

572 The lengths of gaps or overlaps between paired reads were estimated using knowledge of  
573 average library size and alignment of reads to NODE contigs. When both reads of a given  
574 pair mapped to the same NODE contig and the intervening NODE sequence was of a length  
575 typical of a gap in 350-bp insert libraries—between 175 bp (average insert size/2) and 525 bp  
576 (average insert size  $\times$  1.5)—the intervening NODE sequence length was taken to be the  
577 length of the gap or overlap. When two paired reads mapped to different NODE contigs, the  
578 length of the gap or overlap was calculated by subtraction of 225 bp (average insert size  $\times$  1.5  
579 – read length  $\times$  2) from the lengths of the adjacent NODE regions matched by the paired  
580 reads. SR chains and NODE contigs represented by both reads in given read pairs were  
581 joined to form initial paired-read-based connection chains (PR chains), each featuring no  
582 more than a single gap.

583       Following the assembly of initial SR chains and initial PR chains, both chain types were  
584 used along with NODE contigs to form a connection graph. Prior to gap filling, this graph  
585 featured NODE contigs as vertices, linked only by initial SR chains. We attempted to fill  
586 each gap spanned by paired reads by using the left NODE of the gap as a starting point and  
587 seeking all extension paths composed of NODEs along the connection graph until the  
588 extension length exceeded the predicted gap size. NODE sub-chains sharing boundaries with  
589 a given gap were extracted to fill the gap in the initial PR chain, producing one or more filled  
590 PR chains. Paired reads with gaps remaining unfilled after this process were discarded. Next,  
591 we attempted to extend each NODE contig vertex in both forward and reverse orientations  
592 using a connection graph, accepting extensions meeting a signal-to-noise ratio threshold of  
593 50:1. Each initial SR chain or filled PR chain was evaluated to determine whether all the  
594 internal connections were among these connection candidates; if not, then the chain was  
595 excluded from the final SR or PR chain set.

#### 596 *COTG and SCAF contigs*

597       Connection chains for COTG contigs were produced by cyclic extension of each NODE  
598 contig along forward and reverse orientations using SR chains. For each given NODE, a local  
599 connection graph was created using SR chains that contain NODE contigs. NODE contigs  
600 were extended along the local extension graphs. Upon encountering any fork in the graph,  
601 extension was continued using the top candidate if one met the 50:1 signal-to-noise ratio and  
602 10 $\times$  connection coverage thresholds. If such a candidate was found, it was appended to the  
603 existing connection chain or used to create a new one. When no single candidate meeting the  
604 specified criteria was found, extension was reattempted after rebuilding the local connection

605 graph using SR chains matching terminal sub-chains consisting of multiple NODEs in proper  
606 order. Upon removal of duplications from extended chains, the final COTG contigs were  
607 produced.

608 Connection chains for SCAF contigs were produced by cyclic extension of PR chains  
609 along both orientations. For each attempt to extend a PR chain or its extension, we first  
610 evaluated whether the given chain could be extended along each orientation using SR chains  
611 as in the previously described COTG construction step. If a top candidate meeting the  
612 aforementioned thresholding criteria was identified, we next further detected all PR chains  
613 with perfect overlap to the boundaries by comparison of terminal sub-chains and selected the  
614 chain with the longest length for extension. Upon completion of extension for all PR chains,  
615 the extended chains were compared with one another to identify cases in which the chains  
616 were sub-chains of others. Upon removal of redundant chains, the final SCAF contigs were  
617 produced.

618 The SCAF contigs were scanned one by one to detect sub-sequences corresponding to  
619 COTG contigs or NODE contigs; these matches were recorded along with the sequence  
620 orientations and start and end positions. The correspondence of NODE contigs to COTG  
621 contigs was also detected in this manner. The SCAF, COTG and NODE contig sequences  
622 were merged to produce a final continuous contig set of long-read alignments; first, all SCAF  
623 sequences were imported, followed by the COTG sequences that were not sub-sequences of  
624 any SCAF sequences and, finally, NODE sequences that were not a portion of any SCAF or  
625 COTG sequences.

626 *Sequence alignments related to long reads*

627 Contigs were aligned to long reads using the dual approach of pairwise alignment with  
628 BLAST (version 2.2.26)<sup>62</sup> and multiple sequence alignment (MSA) with ClustalW<sup>63</sup>. Initial  
629 alignment was performed via BLAST using the parameters ‘*-p blastn -F F -v 1 -b 5000 -I T -*  
630 *G 2 -E 1 -q -I -W 11*’. From these results, alignments meeting the thresholds of 70% identity  
631 and 150-bp alignment length were extracted. In cases in which two BLAST alignments  
632 meeting the aforementioned thresholds were extracted for a given long read, overlapping  
633 portions of the sequence alignments were compared to inform selection of the appropriate  
634 sequence. The identity score and length were recorded for each sequence alignment. In  
635 situations where a given alignment produced an identity score of 1.0% or an identity length  
636 that was five bp greater than that of any other alignment, it was selected for downstream  
637 assembly. Otherwise, portions of the long read and contigs were further compared by MSA.

638 ClustalW was used to align a given long read with multiple portions of contigs, using the  
639 parameters ‘*-align -output=gde -case=upper -type=dna -pwgapopen=5.0 -pwgapext=1.0 -*  
640 *gapopen=5.0 -gapext=1.0 -gapdist=8 -maxdiv=40 -noweights*’. These parameters were also  
641 used for downstream alignment of long reads with one another during primary pool contig  
642 assembly (described below). All sequence alignments from MSA were stored as aligned base  
643 matrices in which each row represents a sequence and bases or gaps in sequences share a  
644 column in common when aligned. For each column in this matrix, matches between the long  
645 read and each given contig were counted. The alignment with the greatest number of matched  
646 loci was selected for assembly.

647 *Super-pool splitting and long-read-based connection chains*

648 To ascertain the primary pools from which long reads in super pools were sourced, long  
649 reads of each super pool were aligned to contigs from all primary pools that had been pooled  
650 into the given super pool. When portions of a given long read were aligned with contigs from  
651 multiple primary pools, the alignments were investigated as follows to inform judgement of  
652 their source. The alignments were first compared, and any alignments that did not meet an  
653 overlap threshold of 300 bp were discarded. The mapping lengths of the retained alignments  
654 from each primary pool were then counted using the long read as the coordinate axis. Each  
655 long read was assigned to the primary pool with the maximum mapping length, as well as any  
656 primary pools with mapping lengths at least 150 bases less than the maximum mapping  
657 length. Long reads could be assigned to two or more primary pools in certain situations,  
658 particularly if BAC clones with overlaps were pooled into adjacent primary pools.

659 To map NODE contigs to the long reads, final contigs for every primary pool were first  
660 aligned to each long read. All alignments of long reads to SCAF contigs were subsequently  
661 downgraded to alignments to corresponding COTG or NODE contigs on the basis of COTG  
662 or NODE orientations and positions within SCAF contigs, producing two or more COTG or  
663 NODE alignments from a given SCAF alignment. To inform selection of the most  
664 appropriate alignment, alignments showing overlaps of at least 114 bp ( $k$ -mer length  $\times$  1.15)  
665 in length were compared using base identity as a basis to select the ideal NODE alignment or  
666 aligned portion of a COTG alignment. Unselected alignments were discarded. The COTG  
667 alignment was completely excluded in situations in which the retained alignment was less  
668 than 198 bp ( $k$ -mer length  $\times$  2) in length. Once all alignments were compared and filtered, the

669 retained COTG alignments or retained COTG portions were further downgraded to NODE  
670 alignments. Redundancy of NODE alignments was removed from the results, and alignments  
671 were removed if at least one unaligned end of the aligned NODE contig or long read  
672 exceeded 30 bp in length. Subsequently, alignments were removed from the results if their  
673 estimated length of overlap with other alignments exceeded 114 bp ( $k$ -mer length  $\times$  1.15).  
674 The retained alignment results were then converted to raw long-read-based (LR) connection  
675 chains of NODE contigs.

676       The raw LR chains were polished to revise inaccurate, gapped or otherwise faulty  
677 internal connections. For each connection with an estimated length of overlap between 79 bp  
678 ( $k$ -mer length  $\times$  0.8) and 119 bp ( $k$ -mer length  $\times$  1.2), the overlap size was re-evaluated by  
679 alignment to SR and PR chains and revised to reflect the overlap length indicated by these  
680 higher-confidence sequences. For any connections with an overlap size exceeding 98 bp ( $k$ -  
681 mer length - 1) or with any surrounding NODE contig of below  $30\times$   $k$ -mer coverage, all  
682 surrounding NODE contigs were temporarily removed, leaving a new gapped connection. For  
683 all gapped connections, gap filling was attempted as previously described for the gap filling  
684 step of initial PR chain construction. If this process yielded no candidate to fill the gap, the  
685 connection was reset to the previous state. For any gap with two or more candidates, MSA  
686 was performed, and differential loci between candidates and long reads were tallied. The  
687 candidate presenting the fewest differential loci was deemed the ideal choice and retained for  
688 downstream assembly.

689



690 *Primary pool contig assembly*

691       The process of producing contigs for each primary pool began with the initialization of  
692 seeds, which were NODE contigs or chains constructed from gapless matrices of NODE  
693 contigs. A given seed was then extended in both orientations using LR chains that contained  
694 the seed. In accordance with the appropriate direction for extension, columns in the aligned  
695 base matrix were scanned one by one to reveal potential extension paths. Candidates for  
696 extension were accepted when they met the 10:1 signal-to-noise ratio and 10× connection  
697 coverage thresholds. Upon encountering a fork with multiple candidates for extension, the  
698 scan was suspended, and the corresponding LR chains were manually reviewed to inform the  
699 decision for extension.

700       When generating the sequence of genome chains, the paired NODE contigs of candidate  
701 connections in the chain were joined to form a single continuous sequence if the overlaps  
702 were exactly the same; otherwise, a gap was retained. For a given gap, NODE contigs  
703 connected through the chain over a distance of up to 10 kb were scanned, and their  
704 occurrence within all genome chains in the primary pool was tallied. For each non-repetitive  
705 NODE contig, long reads mapped to the same LR chains as the given NODE contig were  
706 collected, and sub-sequences corresponding to the gap were extracted along with flanking  
707 sequences of at most 1,000 bp. MSA was performed on extracted sequences, and consensus  
708 sequences were built from the resulting aligned base matrix. The best choice of all consensus  
709 sequences was determined by MSA and used to close the gap.

710

711 *Chromosome-scale contig assembly and chromosome anchoring*

712 Chromosome-scale contigs were greedily assembled by utilizing overlaps among BAC  
713 sequences. The overlaps for a given BAC sequence were initially identified by aligning the 5  
714 kb terminal sequences of each BAC sequence against those of all others using BLAST with  
715 the parameters '*-p blastn -FF -G2 -E1 -e 1e-4*'. The candidates were first filtered by a  
716 threshold of 99% identity and were evaluated by manual review of dot-plot visualization  
717 results generated using the dotmatcher tool in EMBOSS version 6.5.7.0 with the parameters  
718 '*-windowsize 100 -threshold 90*'.

719 Each chromosome-scale contig was aligned to all survey sequence sets specific to whole  
720 chromosomes or chromosome arms using BLAST with the parameters '*-p blastn -FF -v1 -b*  
721 *10000 -e 1e-10*'. The total length of matching bases in each survey sequence set was  
722 determined, with alignments accepted if they met the 300-bp matched length threshold and  
723 shared 100% identity. Contigs were then anchored to the IWGSC RefSeq v1.0 using the same  
724 BLAST parameters and thresholding criteria used when detecting overlaps between BAC  
725 sequences during chromosome-scale contig assembly. Large structural differences were  
726 identified by manual inspection of the dot-plot visualizations made with MacVector version  
727 17.0.3 (<https://macvector.com/>).

728 *Aligning BAC sequences to the corresponding BAC clones*

729 To match BAC sequences from primary pools to their BAC clones of origin, BAC  
730 sequences from each primary pool were cross-referenced with all WGP tags for each BAC  
731 clone. For each primary pool, exact matches to each whole WGP tag were tallied. When any

732 BAC sequence from a primary pool matched with less than 80% of WGP tags, with only one  
733 or two WGP tags, or matched two or more clones, these results were manually inspected to  
734 remove false positives. For primary pool BAC sequences that were unmatched with their  
735 clone of origin, the search was extended to the MTP library and the source library, and the  
736 results were retained when 80% or more of these tags were perfectly retrieved.

### 737 *Annotation*

738 Gene models were predicted by the BRAKER pipeline (version 2.1.4) using training sets  
739 generated from the high-confidence (HC) or low-confidence (LC) protein models of IWGSC  
740 RefSeq v1.0 and RNAseq data<sup>64</sup>. The predicted gene models were integrated by  
741 EvidenceModeler (v1.1.1)<sup>65</sup>. Functional annotation of these gene models was performed  
742 using eggNOG (Emapper-2.0.1 emapper DB: 2.0)<sup>66</sup>.

### 743 *Primer design, PCR amplification and Sanger sequencing*

744 Repeat junctions in non-2DS contigs, as well as large mis-assemblies in 2DS, were  
745 identified by searching the TREP database by BLAST and inspecting results to identify  
746 junction positions<sup>48</sup>. Primers for amplification of repeat junctions were then designed using  
747 Primer3 (version 2.4.0) with the desired amplicon size set to range from 150 to 650 bp<sup>67</sup>.  
748 PCR was then performed using these primers with 2× Taq DNA Polymerase Master Mix  
749 (Vazyme, China) and the following thermocycler configuration: denaturation at 94 °C for  
750 three min, followed by 32 cycles of denaturation at 94 °C for 30 s, annealing at 55-60 °C for  
751 30 s, and extension at 72 °C for 40 s, and a post-PCR final extension step at 72 °C for 10 min.  
752 PCR products were then separated by electrophoresis on 0.8% agarose gels.

753 For long-range amplification of sequences encompassing boundaries of 2DS large mis-  
754 assemblies, primers were designed to amplify sequences ranging in length from 1,500 to  
755 7,500 bp. PCRs with KOD FX DNA polymerase (KFX-101, Toyobo Co., Ltd.) were  
756 performed as follows: denaturation at 94 °C for 2 min, followed by 36 cycles of denaturation  
757 at 98 °C for 10 s, annealing at 60 °C for 30 s, and extension at 68 °C for 5 min. The resulting  
758 PCR products were then separated by electrophoresis on 1% agarose gels. Samples were  
759 prepared for Sanger sequencing at concentrations based on their respective amplicon sizes  
760 predicted by Primer3 and submitted to TsingKe Co., Ltd. Finally, the Sanger sequences were  
761 subjected to *in silico* manual assembly, performed using MacVector.

762

763

764 **References**

- 765 1 Sherman, R. M. & Salzberg, S. L. Pan-genomics in the human genome era. *Nature*  
766 *Reviews Genetics* **21**, 243-254, doi:10.1038/s41576-020-0210-7 (2020).
- 767 2 Morrell, P. L., Buckler, E. S. & Ross-Ibarra, J. Crop genomics: advances and  
768 applications. *Nature Reviews Genetics* **13**, 85-96, doi:10.1038/nrg3097 (2011).
- 769 3 Shendure, J., Findlay, G. M. & Snyder, M. W. Genomic medicine-progress, pitfalls,  
770 and promise. *Cell* **177**, 45-57, doi:10.1016/j.cell.2019.02.003 (2019).
- 771 4 Doudna, J. A. The promise and challenge of therapeutic genome editing. *Nature* **578**,  
772 229-236, doi:10.1038/s41586-020-1978-5 (2020).
- 773 5 Chain, P. S. G. *et al.* Genome project standards in a new era of sequencing. *Science*  
774 **326**, 236-237, doi:10.1126/science.1180614 (2009).
- 775 6 Kreplak, J. *et al.* A reference genome for pea provides insight into legume genome  
776 evolution. *Nature Genetics* **51**, 1411-1422, doi:10.1038/s41588-019-0480-1 (2019).
- 777 7 Neale, D. B., Martínez-García, P. J., Torre, A. R. D. L., Montanari, S. & Wei, X.-X.  
778 Novel insights into tree biology and genome evolution as revealed through genomics.  
779 *Annual Review of Plant Biology* **68**, 457-483, doi:10.1146/annurev-arplant-042916-  
780 041049 (2017).
- 781 8 Kehr, B. *et al.* Diversity in non-repetitive human sequences not found in the reference  
782 genome. *Nature Genetics* **49**, 588-593, doi:10.1038/ng.3801 (2017).
- 783 9 Hindorff, L. A. *et al.* Prioritizing diversity in human genomics research. *Nature*  
784 *Reviews Genetics* **19**, 175-185, doi:10.1038/nrg.2017.89 (2018).
- 785 10 Wang, H. *et al.* Horizontal gene transfer of *Fhb7* from fungus underlies *Fusarium*  
786 head blight resistance in wheat. *Science* **368**, doi:10.1126/science.aba5435 (2020).
- 787 11 Rawat, N. *et al.* Wheat *Fhb1* encodes a chimeric lectin with agglutinin domains and a  
788 pore-forming toxin-like domain conferring resistance to *Fusarium* head blight. *Nature*  
789 *Genetics* **48**, 1576-1580, doi:10.1038/ng.3706 (2016).
- 790 12 Thankaswamy-Kosalai, S., Sen, P. & Nookaew, I. Evaluation and assessment of read-  
791 mapping by multiple next-generation sequencing aligners based on genome-wide  
792 characteristics. *Genomics* **109**, 186-191, doi:10.1016/j.ygeno.2017.03.001 (2017).
- 793 13 Zhao, Q. *et al.* Pan-genome analysis highlights the extent of genomic variation in  
794 cultivated and wild rice. *Nature Genetics* **50**, 278-284, doi:10.1038/s41588-018-0041-  
795 z (2018).
- 796 14 Bayer, P. E., Golicz, A. A., Scheben, A., Batley, J. & Edwards, D. Plant pan-genomes  
797 are the new reference. *Nature Plants* **6**, 914-920, doi:10.1038/s41477-020-0733-0  
798 (2020).
- 799 15 Shi, L. *et al.* Long-read sequencing and de novo assembly of a Chinese genome.  
800 *Nature Communications* **7**, 12065, doi:10.1038/ncomms12065 (2016).
- 801 16 Jain, M. *et al.* Nanopore sequencing and assembly of a human genome with ultra-long

- 802 reads. *Nature Biotechnology* **36**, 338-345, doi:10.1038/nbt.4060 (2018).
- 803 17 Biscotti, M. A., Olmo, E. & Heslop-Harrison, J. S. P. Repetitive DNA in eukaryotic  
804 genomes. *Chromosome Research* **23**, 415-420, doi:10.1007/s10577-015-9499-z  
805 (2015).
- 806 18 Peer, Y. V. d., Mizrachi, E. & Marchal, K. The evolutionary significance of  
807 polyploidy. *Nature Reviews Genetics* **18**, 411-424, doi:10.1038/nrg.2017.26 (2017).
- 808 19 Prysycz, L. P., Németh, T., Gácsér, A. & Gabaldón, T. Genome comparison of  
809 *Candida orthopsilosis* clinical strains reveals the existence of hybrids between two  
810 distinct subspecies. *Genome Biology and Evolution* **6**, 1069-1078,  
811 doi:10.1093/gbe/evu082 (2014).
- 812 20 Limera, C., Sabbadini, S., Sweet, J. B. & Mezzetti, B. New biotechnological tools  
813 for the genetic improvement of major woody fruit species. *Frontiers in Plant Science*  
814 **8**, 1418, doi:10.3389/fpls.2017.01418 (2017).
- 815 21 Wan, T. *et al.* A genome for gnetophytes and early evolution of seed plants. *Nature*  
816 *Plants* **4**, 82-89, doi:10.1038/s41477-017-0097-2 (2018).
- 817 22 Mascher, M. *et al.* A chromosome conformation capture ordered sequence of the  
818 barley genome. *Nature* **544**, 427-433, doi:10.1038/nature22043 (2017).
- 819 23 Thind, A. K. *et al.* Chromosome-scale comparative sequence analysis unravels  
820 molecular mechanisms of genome dynamics between two wheat cultivars. *Genome*  
821 *Biology* **19**, 104-104, doi:10.1186/s13059-018-1477-2 (2018).
- 822 24 Źmieńko, A., Samelak, A., Kozłowski, P. & Figlerowicz, M. Copy number  
823 polymorphism in plant genomes. *Theoretical and Applied Genetics* **127**, 1-18,  
824 doi:10.1007/s00122-013-2177-7 (2014).
- 825 25 Lee, J. *et al.* Rapid amplification of four retrotransposon families promoted speciation  
826 and genome size expansion in the genus *Panax*. *Scientific Reports* **7**, 9045,  
827 doi:10.1038/s41598-017-08194-5 (2017).
- 828 26 Denton, J. F. *et al.* Extensive Error in the Number of Genes Inferred from Draft  
829 Genome Assemblies. *PLOS Computational Biology* **10**, e1003998,  
830 doi:10.1371/journal.pcbi.1003998 (2014).
- 831 27 Zheng, W. *et al.* High genome heterozygosity and endemic genetic recombination in  
832 the wheat stripe rust fungus. *Nature Communications* **4**, 2673,  
833 doi:10.1038/ncomms3673 (2013).
- 834 28 Chen, E. C. *et al.* Single nucleus sequencing reveals evidence of inter-nucleus  
835 recombination in arbuscular mycorrhizal fungi. *eLife* **7**, doi:10.7554/eLife.39813  
836 (2018).
- 837 29 Mai, Z., Liu, W., Ding, W. & Zhang, G. Misassembly of long reads undermines de  
838 novo-assembled ethnicity-specific genomes: validation in a Chinese Han population.  
839 *Human Genetics* **138**, 757-769, doi:10.1007/s00439-019-02032-6 (2019).
- 840 30 Li, R. *et al.* The sequence and de novo assembly of the giant panda genome. *Nature*

- 841           **463**, 311-317, doi:10.1038/nature08696 (2010).
- 842    31    Forcato, M. *et al.* Comparison of computational methods for Hi-C data analysis.  
843           *Nature Methods* **14**, 679-685, doi:10.1038/nmeth.4325 (2017).
- 844    32    Chan, E. K. F. *et al.* Optical mapping reveals a higher level of genomic architecture of  
845           chained fusions in cancer. *Genome Research* **28**, 726-738, doi:10.1101/gr.227975.117  
846           (2018).
- 847    33    Weisenfeld, N. I., Kumar, V., Shah, P., Church, D. M. & Jaffe, D. B. Direct  
848           determination of diploid genome sequences. *Genome Research* **27**, 757-767,  
849           doi:10.1101/gr.214874.116 (2017).
- 850    34    Acuña-Amador, L., Primot, A., Cadieu, E., Roulet, A. & Barloy-Hubler, F. Genomic  
851           repeats, misassembly and reannotation: a case study with long-read resequencing of  
852           *Porphyromonas gingivalis* reference strains. *BMC Genomics* **19**, 54,  
853           doi:10.1186/s12864-017-4429-4 (2018).
- 854    35    Baker, M. De novo genome assembly: what every biologist should know. *Nature*  
855           *Methods* **9**, 333-337, doi:10.1038/nmeth.1935 (2012).
- 856    36    Doležel, J. *et al.* Chromosomes in the flow to simplify genome analysis. *Functional &*  
857           *Integrative Genomics* **12**, 397-416, doi:10.1007/s10142-012-0293-0 (2012).
- 858    37    Wei, F. *et al.* The physical and genetic framework of the maize B73 genome. *PLoS*  
859           *Genetics* **5**, e1000715, doi:10.1371/journal.pgen.1000715 (2009).
- 860    38    Consortium, I. H. G. S. Initial sequencing and analysis of the human genome. *Nature*  
861           **409**, 860-921, doi:10.1038/35057062 (2001).
- 862    39    Kawahara, Y. *et al.* Improvement of the *Oryza sativa* Nipponbare reference genome  
863           using next generation sequence and optical map data. *Rice* **6**, 4, doi:10.1186/1939-  
864           8433-6-4 (2013).
- 865    40    Schnable, P. S. *et al.* The B73 maize genome: complexity, diversity, and dynamics.  
866           *Science* **326**, 1112-1115, doi:10.1126/science.1178534 (2009).
- 867    41    Consortium, I. W. G. S. Shifting the limits in wheat research and breeding using a  
868           fully annotated reference genome. *Science* **361**, doi:10.1126/science.aar7191 (2018).
- 869    42    Initiative, T. A. G. Analysis of the genome sequence of the flowering plant  
870           *Arabidopsis thaliana*. *Nature* **408**, 796-815, doi:10.1038/35048692 (2000).
- 871    43    Brewer, G. J., Sing, C. F. & Sears, E. R. Studies of isozyme patterns in nullisomic-  
872           tetrasomic combinations of hexaploid wheat. *Proceedings of the National Academy of*  
873           *Sciences of the United States of America* **64**, 1224-1229, doi:10.1073/pnas.64.4.1224  
874           (1969).
- 875    44    (IWGSC), T. I. W. G. S. C. A chromosome-based draft sequence of the hexaploid  
876           bread wheat (*Triticum aestivum*) genome. *Science* **345**, 1251788,  
877           doi:10.1126/science.1251788 (2014).
- 878    45    Zerbino, D. R. & Birney, E. Velvet: algorithms for de novo short read assembly using  
879           *de Bruijn* graphs. *Genome Research* **18**, 821-829, doi:10.1101/gr.074492.107 (2008).

- 880 46 Miller, J. R., Koren, S. & Sutton, G. Assembly algorithms for next-generation  
881 sequencing data. *Genomics* **95**, 315-327, doi:10.1016/j.ygeno.2010.03.001 (2010).
- 882 47 Oeveren, J. v. *et al.* Sequence-based physical mapping of complex genomes by whole  
883 genome profiling. *Genome Research* **21**, 618-625, doi:10.1101/gr.112094.110 (2011).
- 884 48 Wang, Y. *et al.* Development of a D genome specific marker resource for diploid and  
885 hexaploid wheat. *BMC Genomics* **16**, 646, doi:10.1186/s12864-015-1852-2 (2015).
- 886 49 Paux, E. *et al.* A physical map of the 1-gigabase bread wheat chromosome 3B.  
887 *Science* **322**, 101-104, doi:10.1126/science.1161847 (2008).
- 888 50 Feng, K. *et al.* The improved assembly of 7DL chromosome provides insight into the  
889 structure and evolution of bread wheat. *Plant Biotechnology Journal* **18**, 732-742,  
890 doi:10.1111/pbi.13240 (2020).
- 891 51 Yang, N. *et al.* Genome assembly of a tropical maize inbred line provides insights into  
892 structural variation and crop improvement. *Nature Genetics* **51**, 1052-1059,  
893 doi:10.1038/s41588-019-0427-6 (2019).
- 894 52 Ling, H.-Q. *et al.* Genome sequence of the progenitor of wheat A subgenome *Triticum*  
895 *urartu*. *Nature* **557**, 424-428, doi:10.1038/s41586-018-0108-0 (2018).
- 896 53 Koren, S. *et al.* Canu: scalable and accurate long-read assembly via adaptive *k*-mer  
897 weighting and repeat separation. *Genome Research* **27**, 722-736,  
898 doi:10.1101/gr.215087.116 (2017).
- 899 54 Chin, C.-S. *et al.* Phased diploid genome assembly with single-molecule real-time  
900 sequencing. *Nature Methods* **13**, 1050-1054, doi:10.1038/nmeth.4035 (2016).
- 901 55 Zimin, A. V. *et al.* Hybrid assembly of the large and highly repetitive genome of  
902 *Aegilops tauschii*, a progenitor of bread wheat, with the MaSuRCA mega-reads  
903 algorithm. *Genome Research* **27**, 787-792, doi:10.1101/gr.213405.116 (2017).
- 904 56 Monat, C. *et al.* TRITEX: chromosome-scale sequence assembly of Triticeae  
905 genomes with open-source tools. *Genome Biology* **20**, 284, doi:10.1186/s13059-019-  
906 1899-5 (2019).
- 907 57 Clavijo, B. J. *et al.* An improved assembly and annotation of the allohexaploid wheat  
908 genome identifies complete families of agronomic genes and provides genomic  
909 evidence for chromosomal translocations. *Genome Research* **27**, 885-896,  
910 doi:10.1101/gr.217117.116 (2017).
- 911 58 Zimin, A. V. *et al.* The first near-complete assembly of the hexaploid bread wheat  
912 genome, *Triticum aestivum*. *Gigascience* **6**, 1-7, doi:10.1093/gigascience/gix097  
913 (2017).
- 914 59 Alonge, M., Shumate, A., Puiu, D., Zimin, A. & Salzberg, S. L. Chromosome-scale  
915 assembly of the bread wheat genome reveals thousands of additional gene copies.  
916 *Genetics*, doi:10.1534/genetics.120.303501 (2020).
- 917 60 Lin, K. *et al.* Single nucleus genome sequencing reveals high similarity among nuclei  
918 of an endomycorrhizal fungus. *PLoS Genetics* **10**, e1004078,



- 919           doi:10.1371/journal.pgen.1004078 (2014).
- 920   61    LB (Luria-Bertani) liquid medium. *Cold Spring Harbor Protocols* **2006**, pdb.rec8141  
921           (2006).
- 922   62    Altschul, S. F. *et al.* Gapped BLAST and PSI-BLAST: a new generation of protein  
923           database search programs. *Nucleic Acids Research* **25**, 3389-3402,  
924           doi:10.1093/nar/25.17.3389 (1997).
- 925   63    Larkin, M. A. *et al.* Clustal W and Clustal X version 2.0. *Bioinformatics* **23**, 2947-  
926           2948, doi:10.1093/bioinformatics/btm404 (2007).
- 927   64    Hoff, K. J., Lomsadze, A., Borodovsky, M. & Stanke, M. Whole-genome annotation  
928           with BRAKER. *Methods in Molecular Biology* **1962**, 65-95, doi:10.1007/978-1-4939-  
929           9173-0\_5 (2019).
- 930   65    Haas, B. J. *et al.* Automated eukaryotic gene structure annotation using  
931           EVIDENCEModeler and the Program to Assemble Spliced Alignments. *Genome*  
932           *Biology* **9**, R7, doi:10.1186/gb-2008-9-1-r7 (2008).
- 933   66    Huerta-Cepas, J. *et al.* eggNOG 5.0: a hierarchical, functionally and phylogenetically  
934           annotated orthology resource based on 5090 organisms and 2502 viruses. *Nucleic*  
935           *Acids Research* **47**, D309-D314, doi:10.1093/nar/gky1085 (2019).
- 936   67    Untergasser, A. *et al.* Primer3--new capabilities and interfaces. *Nucleic Acids*  
937           *Research* **40**, e115, doi:10.1093/nar/gks596 (2012).
- 938
- 939

970 **Table 1. Summary of assembly and chromosome anchoring**

---

|                         |             |
|-------------------------|-------------|
| Number of BAC sequences | 2,970       |
| Total length (bp)       | 454,642,206 |
| Average length (bp)     | 153,078     |
| GC content (%)          | 46.5        |
| <br>                    |             |
| Number of contigs       | 458         |
| Total length (bp)       | 271,367,541 |
| Average length (bp)     | 592,506     |
| N50 length (bp)         | 1,039,371   |

---

|                           |             |
|---------------------------|-------------|
| Number of 2DS contigs     | 329         |
| Total length (bp)         | 248,890,308 |
| Average length (bp)       | 756,505     |
| N50 length (bp)           | 111,7623    |
| <br>                      |             |
| Number of non-2DS contigs | 129         |
| Total length (bp)         | 22,477,233  |
| Average length (bp)       | 174,242     |

---

|                                                 |             |
|-------------------------------------------------|-------------|
| Length of 2DS portion in IWGSC RefSeq v1.0 (bp) | 268,023,062 |
| Number of gaps                                  | 10,434      |
| Number of mapped contigs                        | 326         |
| Total length of mapped contigs (bp)             | 248,378,867 |
| <br>                                            |             |
| Length of 2DS portions mapped by contigs (bp)   | 248,373,015 |
| Coverage rate                                   | 92.7%       |
| <br>                                            |             |
| Number of filled gaps in 2DS portion            | 9,621       |
| Number of unfilled gaps                         | 813         |
| Closing rate                                    | 92.2%       |

---

971

972

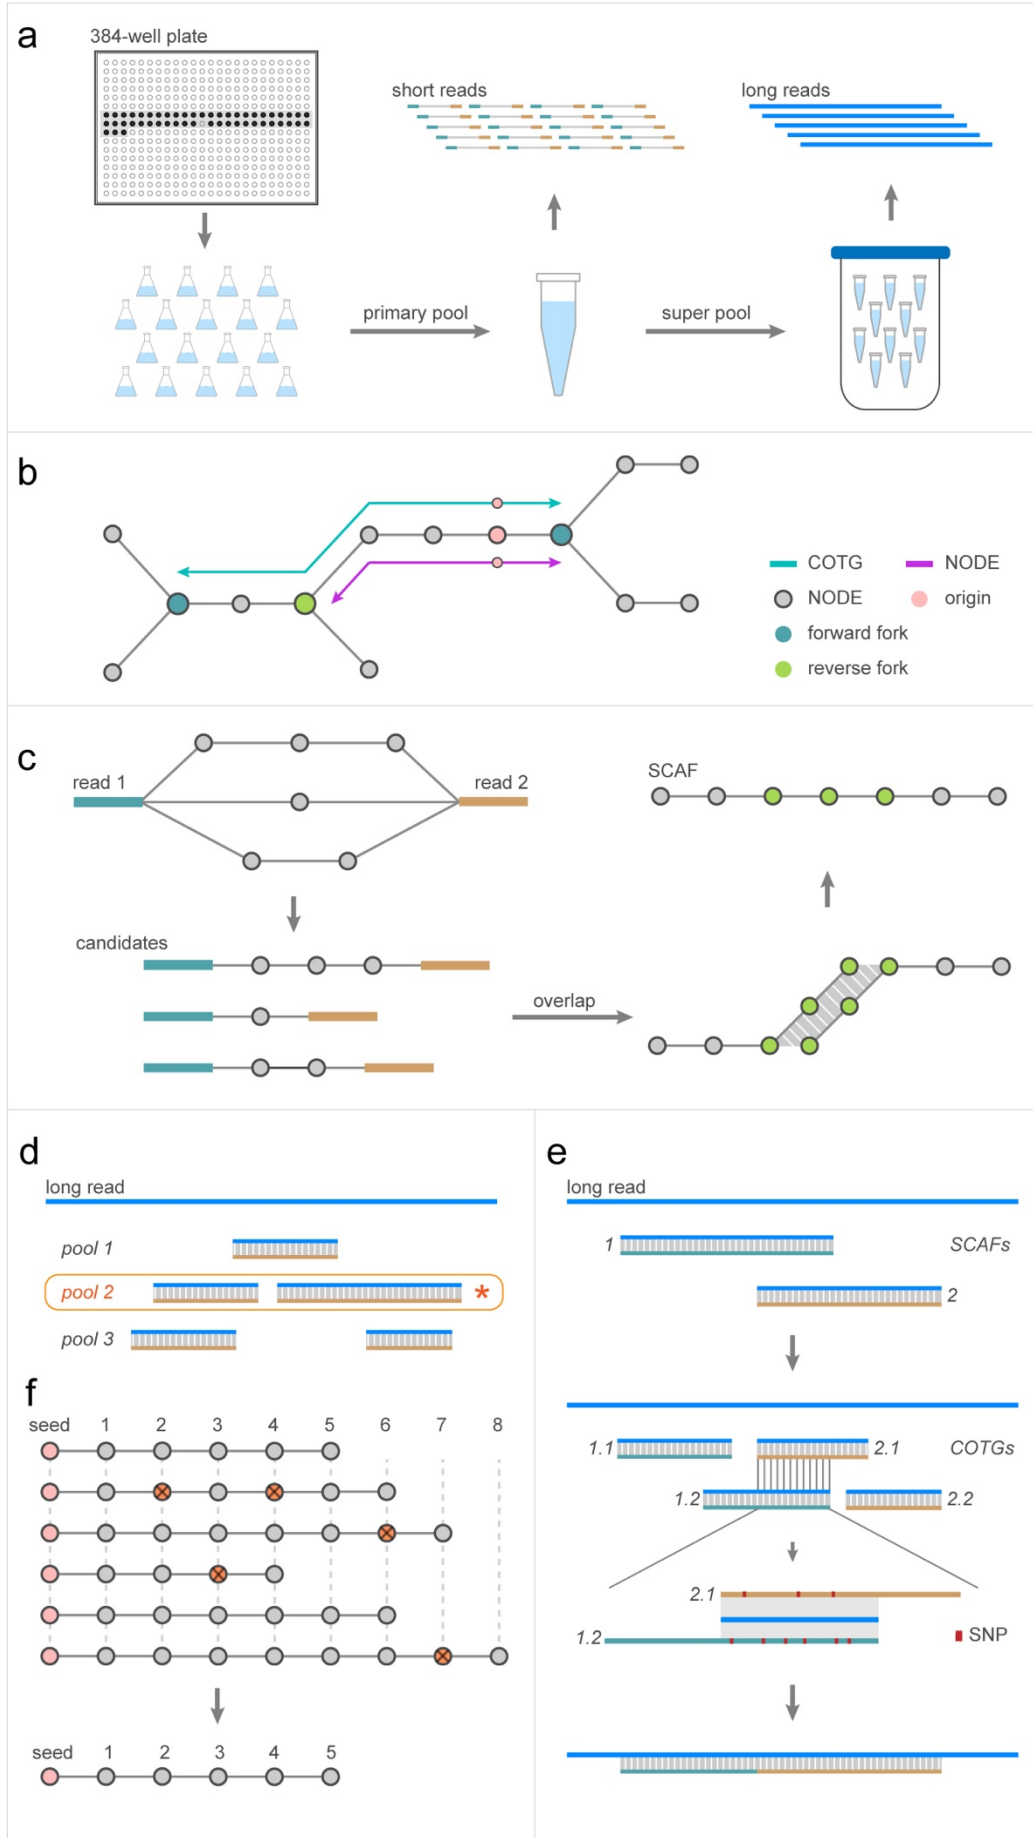

974 **Figure 1.** Overview of the pooling design and the Lamp assembler algorithm: **(a)** BAC  
975 clones were selected and cultured individually in Erlenmeyer flasks. The cultures were  
976 combined into mixtures with equal concentrations of cells from each culture, followed by  
977 plasmid extraction for short-read sequencing. These samples were further pooled into equal-  
978 concentration mixtures of combined plasmid DNA primary pools, producing super pools for  
979 long-read sequencing. **(b)** A given  $k$ -mer was extended by following a *de Bruijn* graph. The  
980 extension was suspended upon reaching a fork point to produce a unitig for the NODE contig  
981 set and continued until reaching a forward fork to produce a COTG contig. **(c)** Between reads  
982 of each read pair, paths were extended to fill the inner gap, and the outer ends of the reads  
983 were extended as COTG contigs. Overlaps were detected between contigs, and overlapping  
984 contigs were merged to produce SCAF contigs. **(d)** Alignments of a given long-read segment  
985 against SCAF contigs from multiple primary pools were compared to determine the source of  
986 long reads. A given long read was assigned to the primary pool with which alignment  
987 produced the greatest total aligned sequence length. **(e)** Alignments of long reads to SCAF  
988 contigs were first converted to alignments with COTG contigs and then compared with each  
989 other. The retained alignments were further downgraded to NODE-based chains connected  
990 by long reads. Inner gaps of these chains were filled first by attempting path extension and  
991 subsequently filled with the candidate extension deemed optimal based on the percent  
992 identity of alignments. **(f)** Seed contigs were used as scaffolds against which long-read chains  
993 were aligned, producing gapless matrices with each seed as an origin. Finally, these seeds  
994 were extended in accordance with these gapless matrices, yielding the final set of contigs on  
995 a chromosome scale.

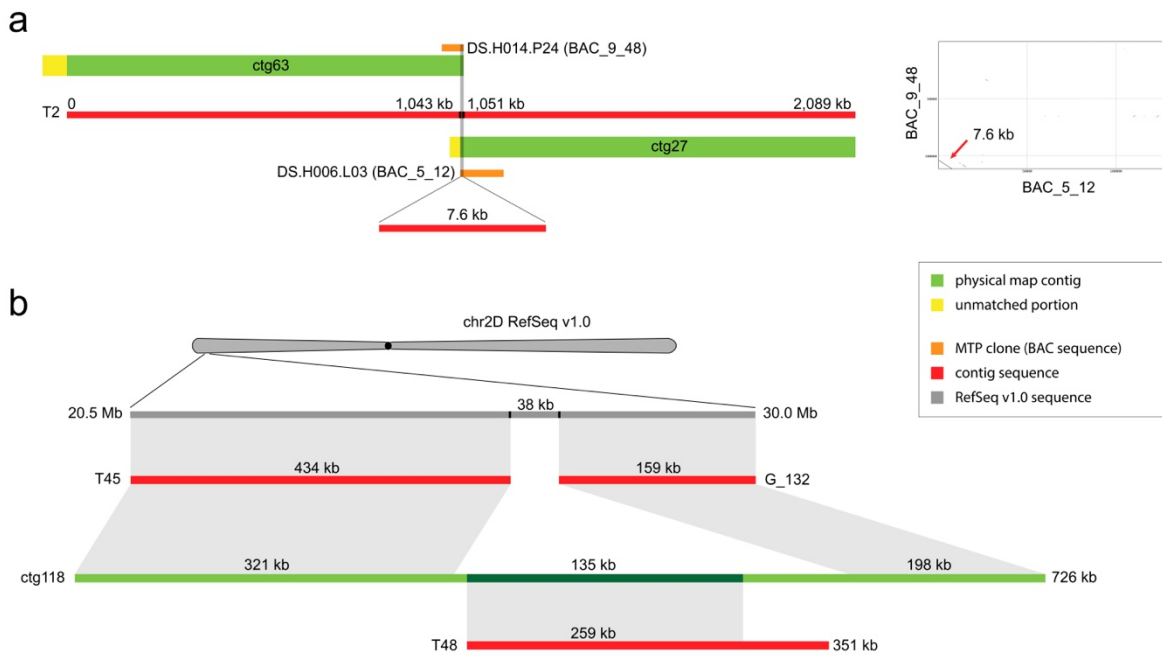

996

997 **Figure 2.** Comparison of contig sequences to physical map contigs: **(a)** Illustration of contig

998 retrieval and dot-plot visualization showing the overlap that is absent from the physical map

999 contigs but indicated by the assembly of the T2 contig sequence. **(b)** Illustration of a

1000 candidate anchoring position for the T48 contig sequence in IWGSC RefSeq v1.0 compared

1001 to physical map contigs.

1002

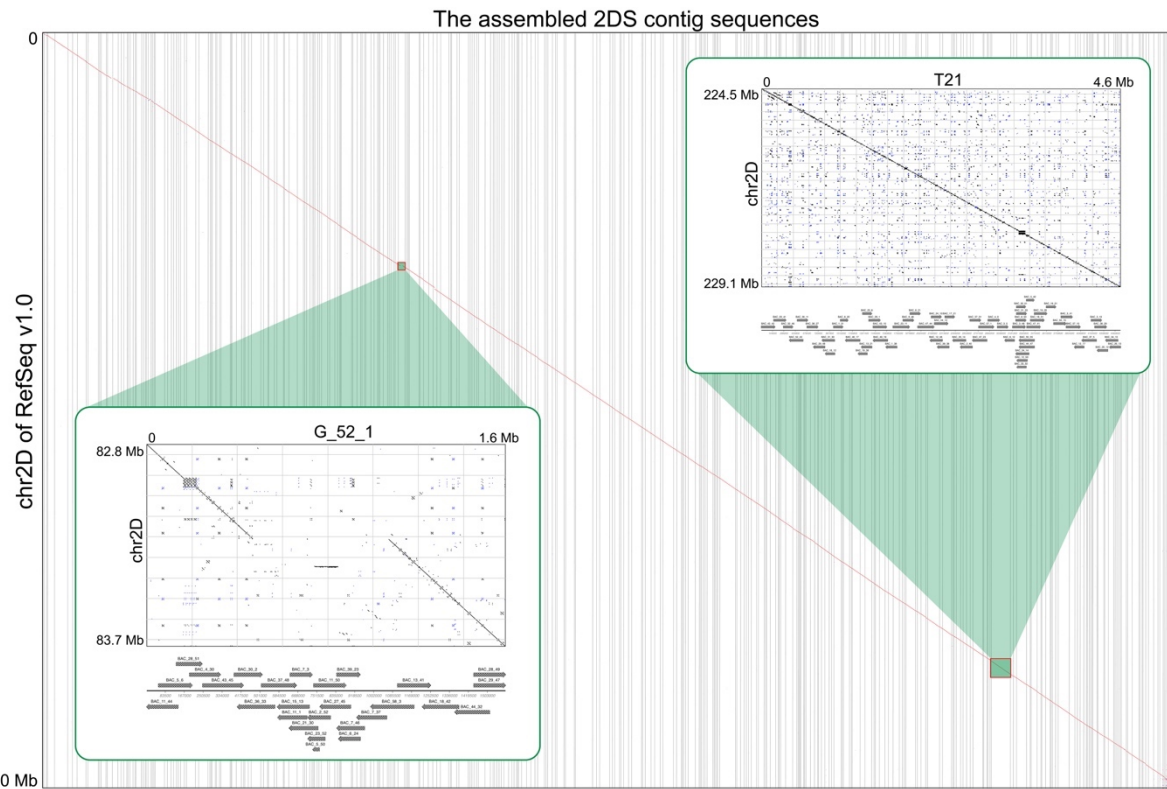

1003

1004

**Figure 3.** Global comparisons of our assembled 2DS contig sequences to IWGSC RefSeq

1005

v1.0. Dot-plot visualizations and assembly details of T21 and G\_52\_1 contig sequences were

1006

magnified to be inspected. The T21 contig sequence shows a high degree of structural

1007

consistency with the associated fragment of 2DS, while a 602 kb structural inconsistency in

1008

the G\_52\_1 contig sequence is revealed.

1009

1010 **Supplemental Table 1. Pooling design of the TaaCsp2DSMTP BAC library:** The  
1011 coordinates of MTP clones in 384-well plates as received from CNRGV are shown along  
1012 with the positions of these clones in physical map contigs. The nomenclature of BAC clones  
1013 is shown in Figure s1.

1014 **Supplemental Table 2. Characteristics of BAC sequences:** All of these data were  
1015 calculated for each BAC sequence following end-trimming of vector sequences.

1016 **Supplemental Table 3. Average insert sizes of BAC clones in primary pools.**

1017 **Supplemental Table 4. Characteristics of contig sequences.**

1018 **Supplemental Table 5. Positions and orientations of BAC sequences in contig sequences.**

1019 **Supplemental Table 6. Summary of portions in contig sequences that align with genome  
1020 survey sequences from each chromosome or arm:** These summary statistics were produced  
1021 for alignments with 100% identity over a minimum length of 300 bp. The abbreviations for  
1022 each genome survey sequence set are listed in the footnote.

1023 **Supplemental Table 7. Details of contig sequences aligned to genome survey sequences  
1024 of each chromosome or arm:** Details are listed for all alignments with 100% identity over a  
1025 minimum length of 300 bp. The abbreviations for each genome survey sequence set are the  
1026 same as those listed in the footnote of Table s6.

1027 **Supplemental Table 8. Details of the results from anchoring contig sequences to IWGSC  
1028 RefSeq v1.0.**

1029 **Supplemental Table 9. Correspondence between BAC sequences and MTP clones.**

1030 **Supplemental Table 10. Details of MTP clones matching multiple BAC sequences from  
1031 the same primary pool.**

1032 **Supplemental Table 11. Details of positional comparisons in the physical map between**  
1033 **unmatched BAC sequences and unmatched clones from plate Nos. 25-32 and 81-88 of**  
1034 **the source library:** Following the workflow illustrated in Figure s7, the positions of  
1035 unmatched BAC sequences in the physical map were estimated using adjacent BAC  
1036 sequences in the contig sequences listed in Table s5. Marked in red letters are the detected  
1037 positional overlaps of the BAC sequence to specific clones from the same primary pool.

1038 **Supplemental Table 12. Summary of alignments between unmatched BAC sequences**  
1039 **and BAC clones with WGP tags.**

1040 **Supplemental Table 13. Alignments of unmatched BAC sequences to clones with WGP**  
1041 **tags in the MTP library:** A given BAC clone was considered to be aligned to an MTP clone  
1042 if at least 80% of WGP tags for the clones were detected in the BAC sequence.

1043 **Supplemental Table 14. Alignments of unmatched BAC sequences to MTP clones with**  
1044 **WGP tags in the source library:** A BAC clone was considered to be aligned based on the  
1045 same criteria used in Table s13.

1046 **Supplemental Table 15. Correspondences between contig sequences and physical map**  
1047 **contigs:** Contig sequences containing at least five MTP clones corresponding to unique BAC  
1048 sequences are listed. Marked in red letters are contig sequences matching two or more  
1049 portions of physical map contigs.

1050 **Supplemental Table 16. Positional relationships between physical map contigs and BAC**  
1051 **sequences in contig sequences:** Five chimeric BAC sequences and 16 BAC sequences listed  
1052 in Table s10 are not included.



1053 **Supplemental Table 17. Alignments of physical map contigs and IWGSC RefSeq v1.0**  
1054 **using the assembled contig sequences as a medium.**

1055 **Supplemental Table 18. Characteristics of large structural differences between contig**  
1056 **sequences and IWGSC RefSeq v1.0.**

1057 **Supplemental Table 19. Functional annotations of large structural differences.**

1058 **Supplemental Table 20. Summary of large structural differences matched to the**  
1059 **unanchored sequences (chrUn) in IWGSC RefSeq v1.0:** Summary statistics are shown for  
1060 alignments of 99% identity and greater over lengths of at least 3 kb.

1061 **Supplemental Table 21. Details of large structural differences matching to the**  
1062 **unanchored sequences (chrUn) sequence in IWGSC RefSeq v1.0:** Details are provided for  
1063 the same alignments as featured in Table S20, specifically for alignments with 99% identity  
1064 and greater over lengths of at least 3 kb.

1065 **Supplemental Table 22. Summary of portions of large structural differences aligned to**  
1066 **genome survey sequences of each chromosome or arm:** Summary statistics are shown only  
1067 for alignments of 100% identity over a minimum length of 300 bp. Genome survey sequences  
1068 are labelled with abbreviations as in Table s6.

1069 **Supplemental Table 23. Details of large structural differences aligned to genome survey**  
1070 **sequences of each chromosome or arm:** Details are provided for the same alignments as in  
1071 Table s18, with 100% identity over a minimum length of 300 bp. Genome survey sequences  
1072 are labelled with abbreviations as in Table s6.

1073 **Supplemental Table 24. Primers used in chromosome anchoring experiments for non-**  
1074 **2DS contigs and 2DS large misassemblies.**

1075 **Supplemental Table 25. Primers used for PCR amplification and Sanger sequencing to**

1076 **investigate and confirm boundaries of 2DS large misassemblies.**

1077

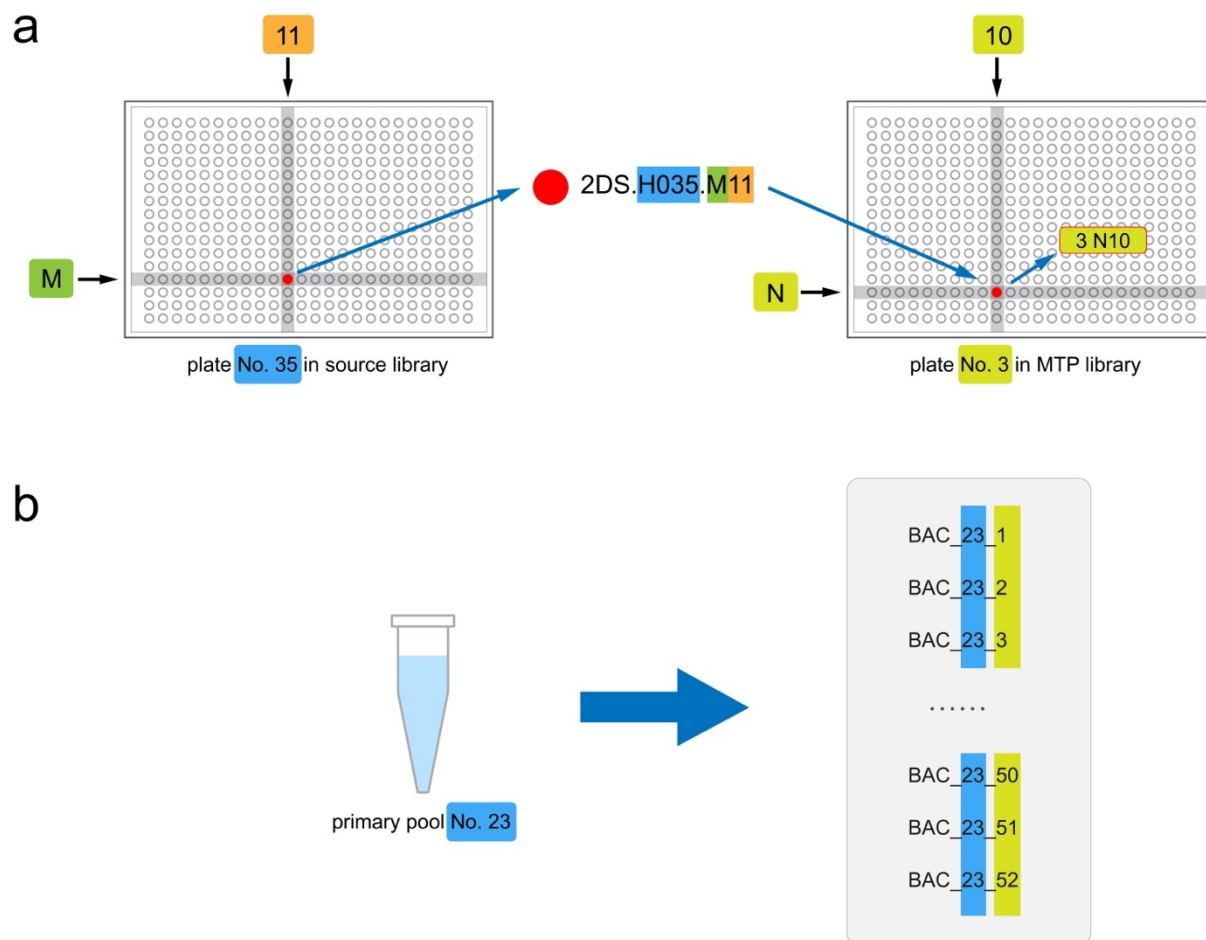

1078

1079 **Supplemental Figure 1. Nomenclature of BAC clones and BAC sequences: (a)** The BAC

1080 clone was named according to its well position in the source library. In the MTP library, its

1081 well position was recorded separately. **(b)** The BAC sequence was named according to the

1082 number of primary pools, followed by a number assigned during sequence assembly.

1083

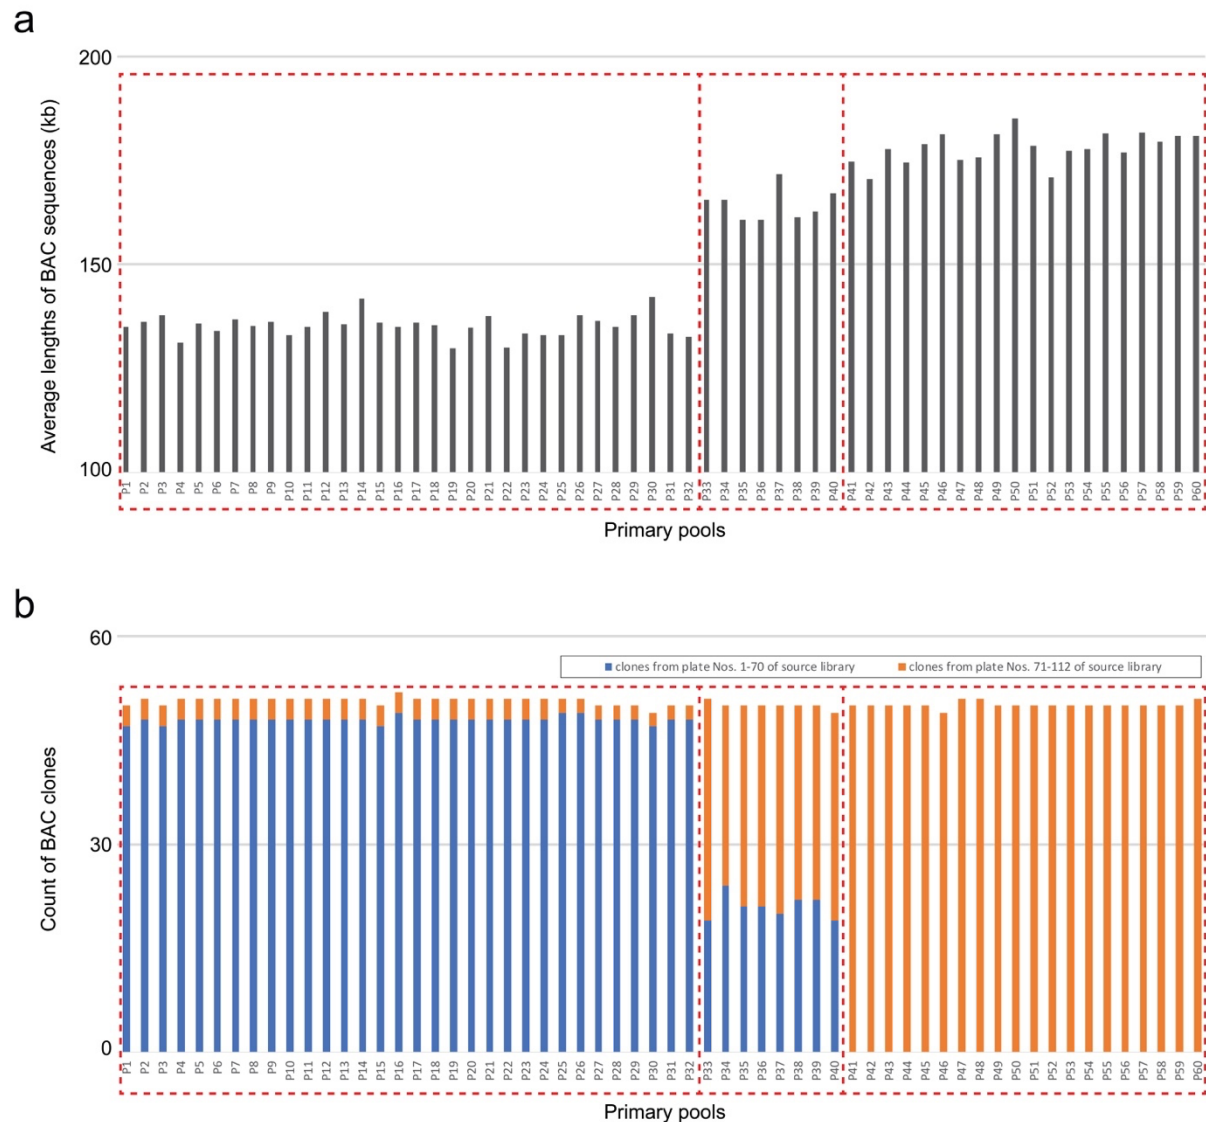

1084

1085 **Supplemental Figure 2.** Bar charts showing that insert lengths differed among the 60  
1086 primary pools, which is consistent with the 2DS source library in which clones in plate Nos.  
1087 71-112 were detected to have a greater average insert size than those in plate Nos. 1-70  
1088 (*Isolation of BAC DNA and insert analysis* section in Material s8). In our BAC assembly, the  
1089 insert lengths range between 130-142 kb for primary pool Nos. 1-32, 171-184 kb for pool  
1090 Nos. 41-60, and 161-172 kb for pool Nos. 33-40 (a), corresponding to clones in source  
1091 library plate Nos. 1-70 and Nos. 71-112 and a mixture of the above two fractions,  
1092 respectively (b).

**a** Window Size = 100    Strand = Both    Scoring Matrix: DNA database matrix.nmat  
 Min. % Score = 98    Jump = 1  
 Hash Value = 8

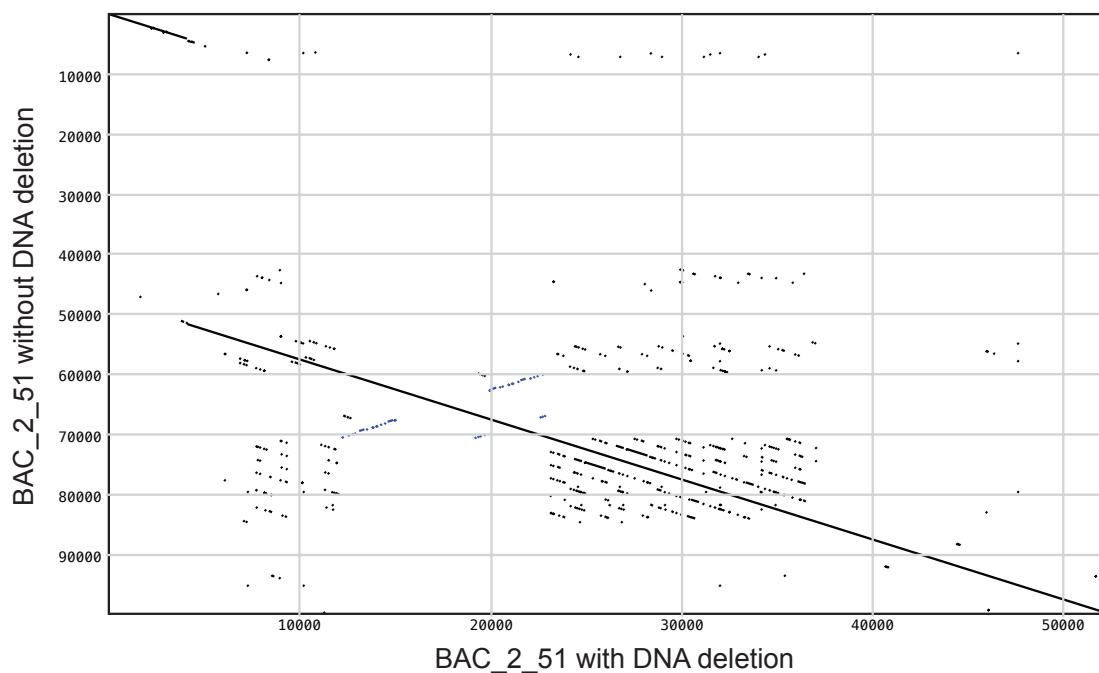

1093

**b**

| serial number | length | orientation | coverage | repeat status | overlap length | distance |
|---------------|--------|-------------|----------|---------------|----------------|----------|
| 12570         | 167    | -1          | 448      | 0             | 98             | 0        |
| 51208         | 15     | 1           | 682      | 0             | 98             | 0        |
| 9263          | 100    | -1          | 757      | 0             | 98             | 0        |
| 24162         | 31     | 1           | 543      | 0             | 98             | 0        |
| 39986         | 27     | -1          | 694      | 0             | 98             | 0        |
| 3337          | 143    | -1          | 476      | 0             | 98             | 0        |
| 45145         | 41     | -1          | 416      | 0             | 98             | 0        |
| 1828          | 138    | 1           | 510      | 0             | 98             | 0        |
| 13499         | 130    | -1          | 601      | 0             | 98             | 0        |
| 68224         | 31     | -1          | 583      | 0             | 98             | 0        |
| 26909         | 42     | -1          | 508      | 0             | 98             | 0        |
| 1551          | 450    | 1           | 465      | 0             | -1             | -1       |

unitig chains with DNA deletion

| serial number | length | orientation | coverage | repeat status | overlap length | distance |
|---------------|--------|-------------|----------|---------------|----------------|----------|
| 3337          | 143    | -1          | 476      | 0             | 98             | 0        |
| 62441         | 3      | -1          | 60       | 0             | 98             | 0        |
| 28821         | 51     | 1           | 198      | 0             | 98             | 0        |
| 55638         | 19     | 1           | 153      | 0             | 98             | 0        |
| 81360         | 5      | -1          | 269      | 0             | 98             | 0        |
| 49861         | 8      | -1          | 359      | 0             | 98             | 0        |
| 30665         | 42     | -1          | 179      | 0             | 98             | 0        |
| 68470         | 9      | -1          | 144      | 0             | 98             | 0        |
| 48067         | 18     | 1           | 145      | 0             | 98             | 0        |
| 27900         | 24     | 1           | 194      | 0             | 98             | 0        |
| 4229          | 368    | 1           | 66       | 0             | 98             | 0        |
| ... ..        |        |             |          |               |                |          |
| 12139         | 151    | -1          | 62       | 0             | 98             | 0        |
| 40083         | 53     | 1           | 158      | 0             | 98             | 0        |
| 28821         | 51     | 1           | 198      | 0             | 98             | 0        |
| 10658         | 101    | 1           | 58       | 0             | 98             | 0        |
| 27900         | 24     | 1           | 194      | 0             | 98             | 0        |
| 24662         | 24     | 1           | 153      | 0             | 98             | 0        |
| 47416         | 16     | 1           | 45       | 0             | 98             | 0        |
| 33678         | 4      | 1           | 152      | 0             | 98             | 0        |
| 31123         | 56     | 1           | 55       | 0             | 98             | 0        |
| 1828          | 138    | 1           | 510      | 0             | 98             | 0        |

unitig chains without DNA deletion

1094

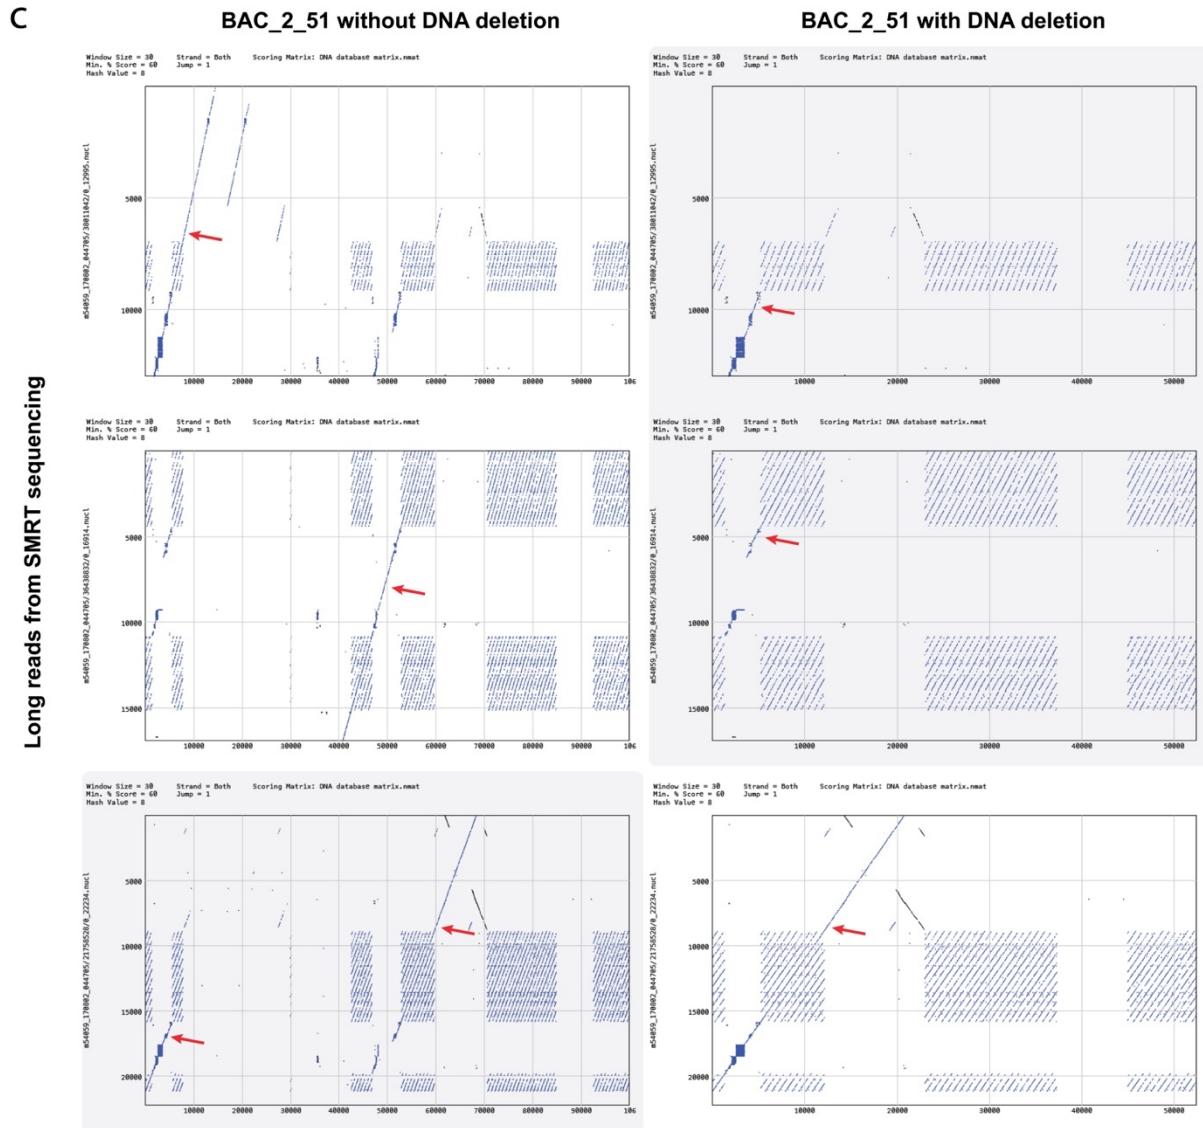

1095

1096 **Supplemental Figure 3.** Illustration of a putative plasmid DNA deletion event in the clone

1097 with the sequence of BAC\_2\_51: (a) Dot-plot visualizations of assembled BAC sequences

1098 with and without the putative deletion event. (b) The short-read-based unitig chain of

1099 BAC\_2\_51 forked in the *de Bruijn* graph is shown. Each row represents a unitig in the chain,

1100 for which attributes (stored as tab-delimited text) include serial number, *k*-mer based length,

1101 orientation, coverage, repeat status (a placeholder that is reserved for use in the future; its

1102 values were all set to 0 here), overlap length and distances to adjacent unitigs. (c) The dot-

1103 plot visualizations of long reads support both assemblies (with and without DNA deletion).

1104 The first and second rows show dot-plot visualizations for long reads that support the  
1105 assembly without DNA deletion, whereas the third row provides long-read-based evidence  
1106 for the putative plasmid DNA deletion event. Red arrows mark lines showing collinearity  
1107 between BAC sequences and long reads.  
1108

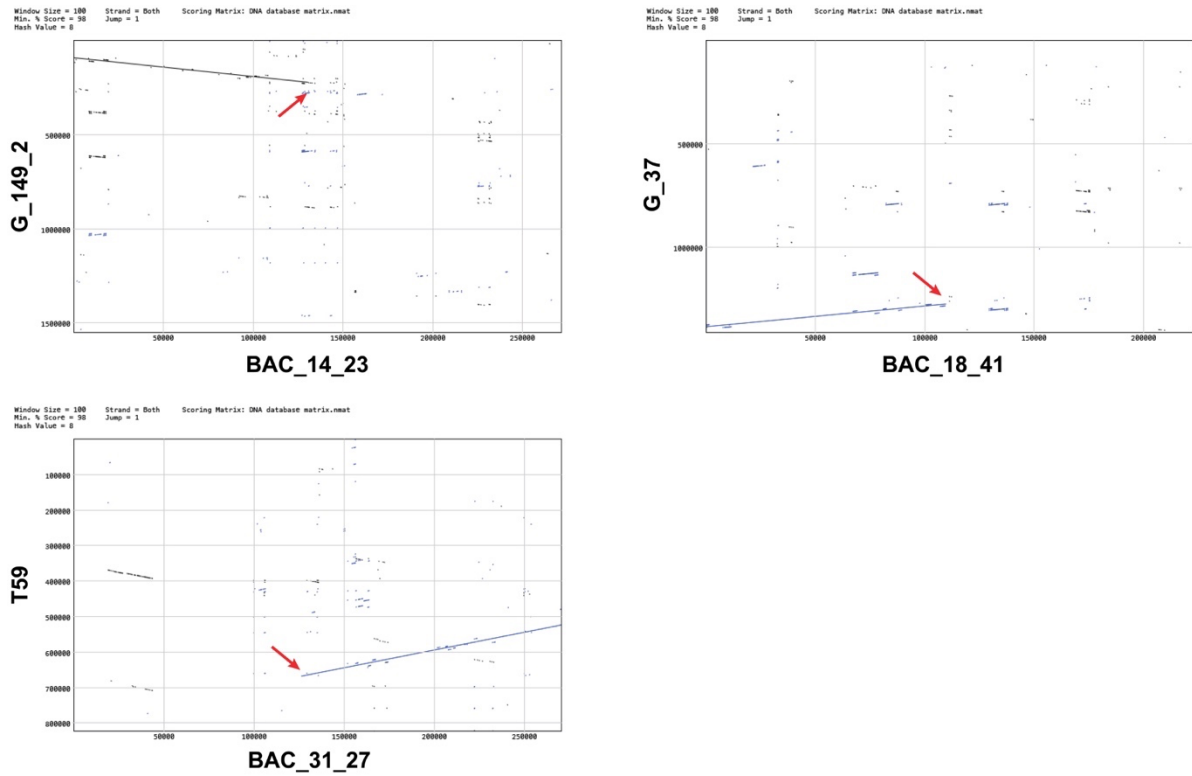

1109

1110 **Supplemental Figure 4.** Dot-plot visualizations for alignment of chimeric BAC sequences

1111 against contig sequences with partial overlaps. Red arrows mark the junction point (x-axis) in

1112 chimeric sequences.

1113



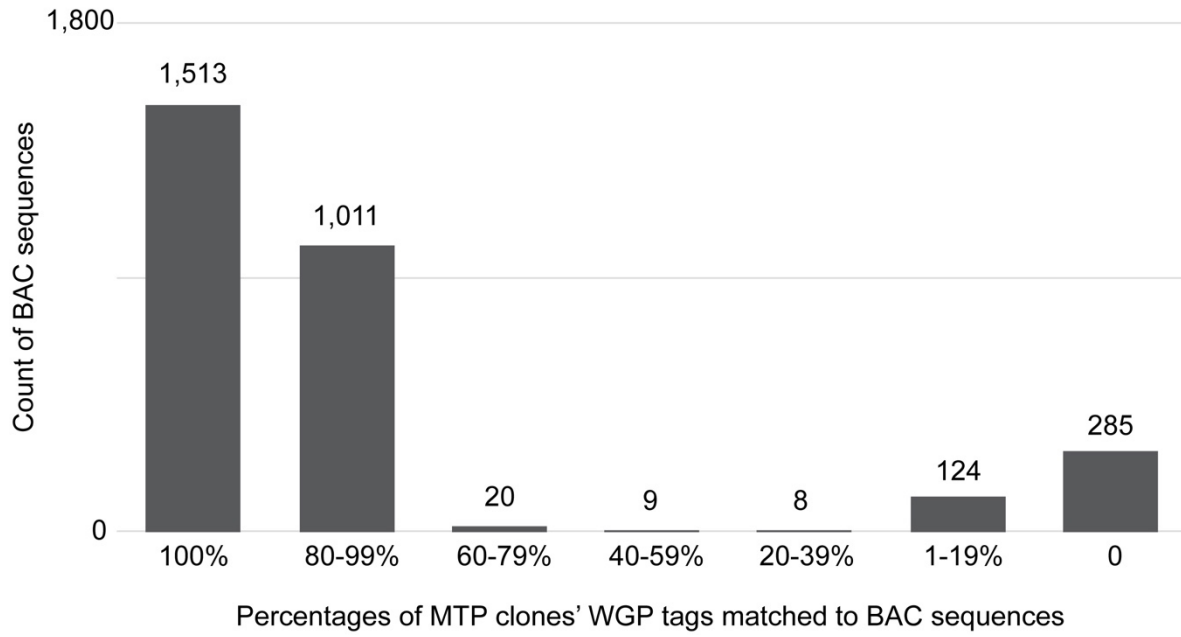

1114

1115 **Supplemental Figure 5.** Proportional distribution of MTP clones' WGP tags matched to

1116 BAC sequences.

1117

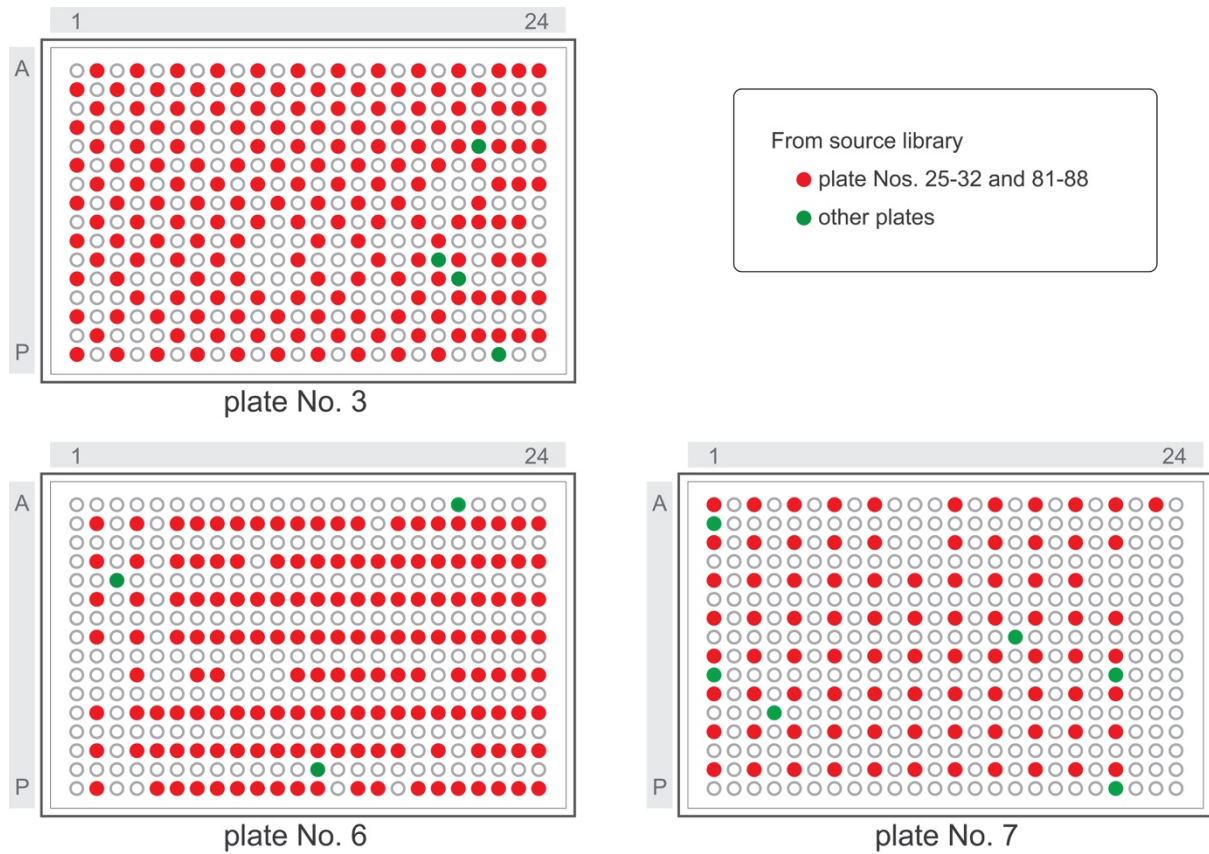

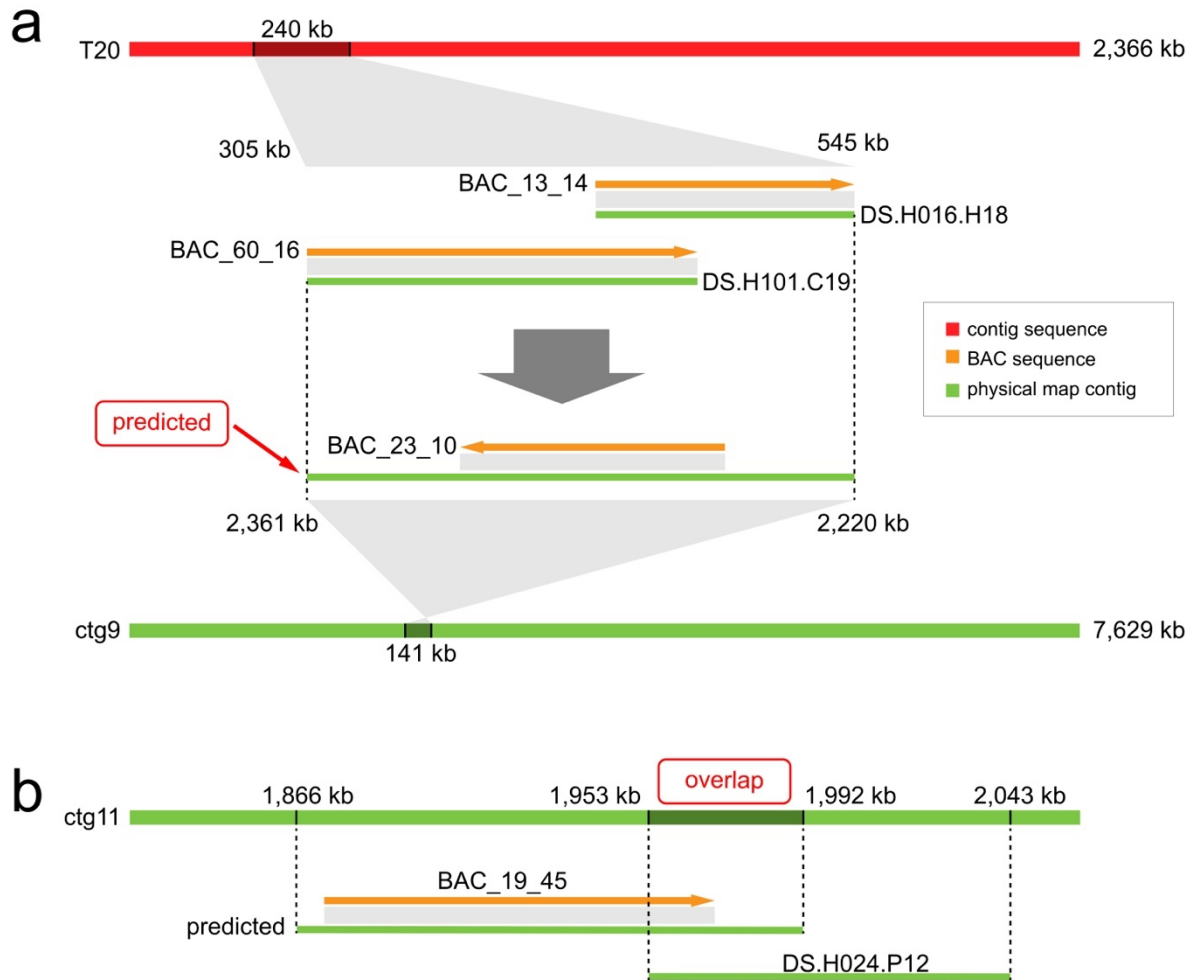

1122

1123 **Supplemental Figure 7.** Illustration of a workflow to re-anchor BAC sequences to a physical

1124 map and detect their potential overlaps with the unmatched MTP clones: **(a)** The BAC\_23\_10

1125 sequence was re-anchored to the ctg9 physical map contig, with an estimated position in the

1126 physical map ranging from 2,220-2,361 kb based on its adjacent BAC sequences on the T20

1127 contig. **(b)** An overlap candidate on the ctg11 physical map contig was detected between the

1128 BAC\_19\_45 sequence and DS.H024.P12 clone.

1129

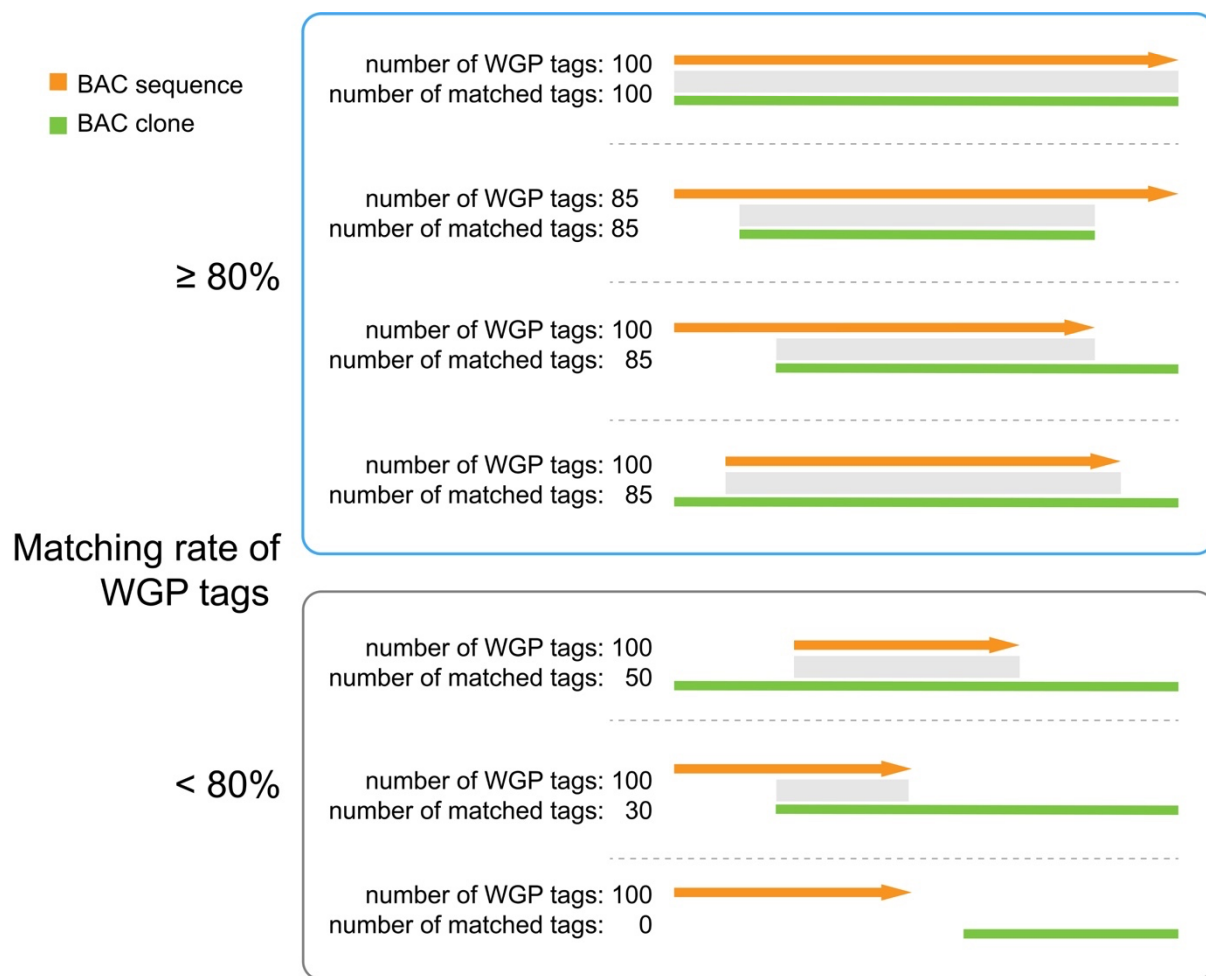

1130

1131 **Supplemental Figure 8.** Illustration of how one BAC sequence might match multiple BAC

1132 clones in the MTP library or source library, as shown in Tables s12, s13 and s14.

1133

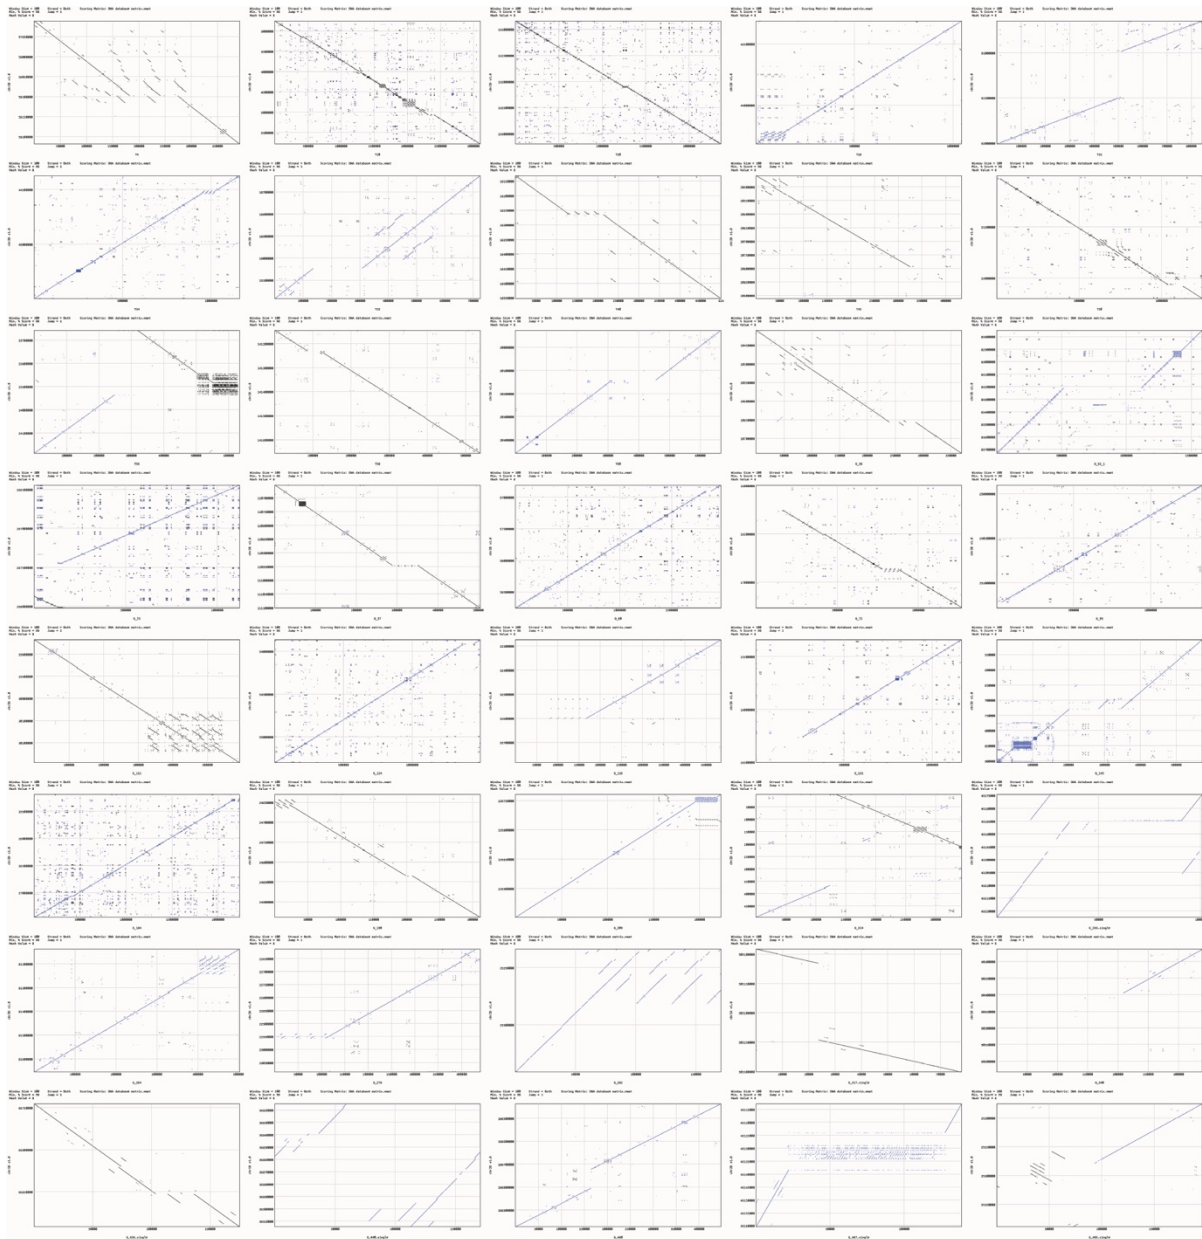

1134

1135 **Supplemental Figure 9.** Dot-plot comparisons of contig sequences aligned against

1136 corresponding sequences in IWGSC RefSeq v1.0 reveal large structural differences.

1137

**a. Non-2DS contigs, the first round of the experiment**

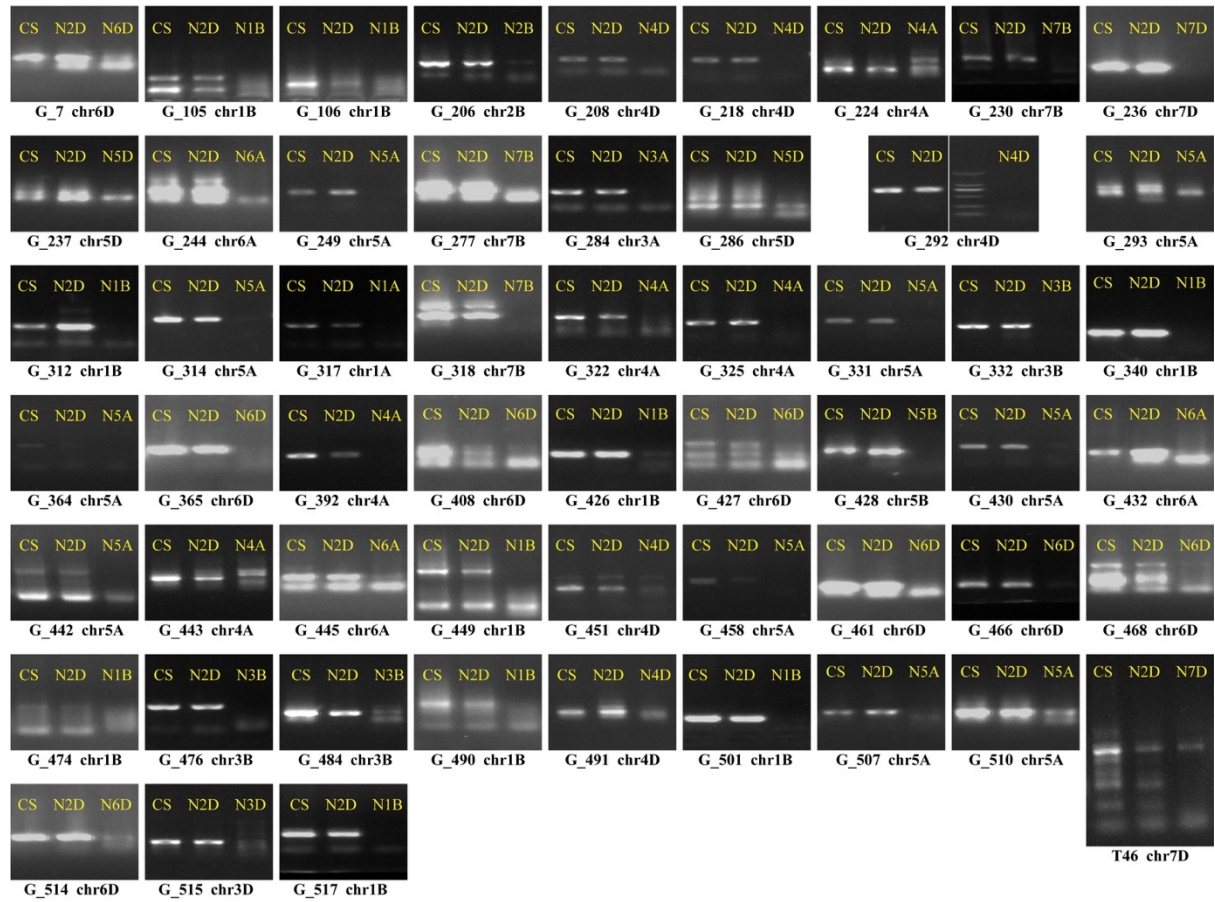

**b. Non-2DS contigs, the second round of the experiment**

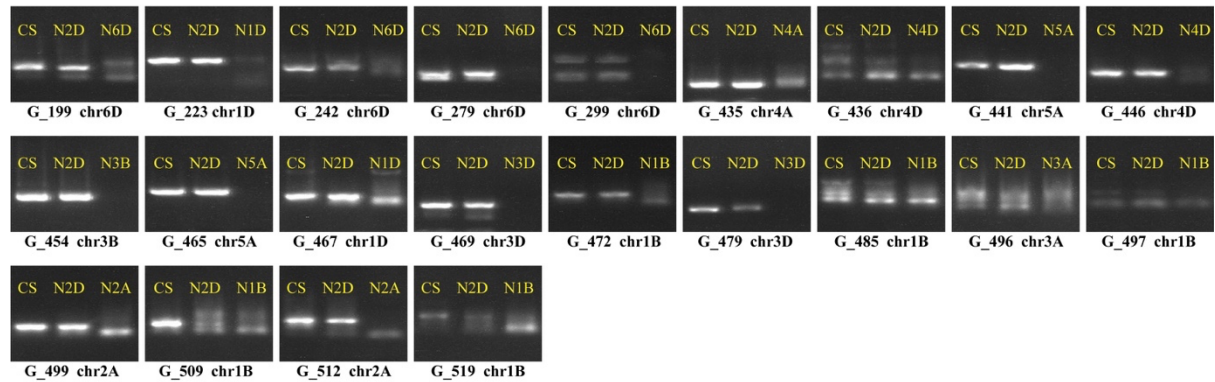

**c. Large misassemblies in the 2DS arm**

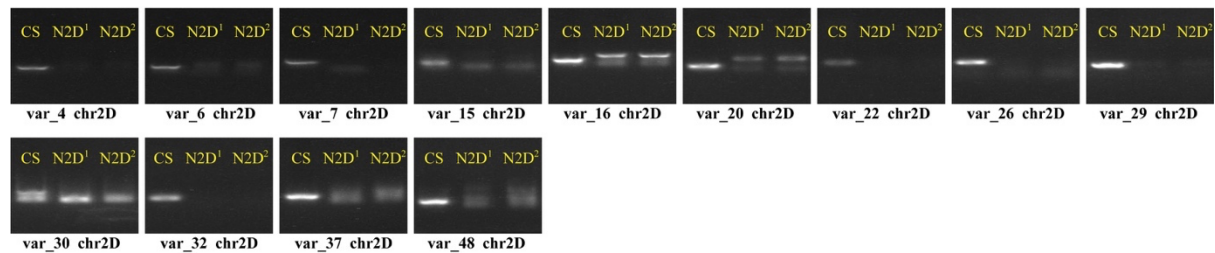

1139 **Supplemental Figure 10.** The results from chromosome anchoring experiments confirm  
1140 chromosomes of origin for non-2DS contigs **(a, b)** and large misassemblies in 2DS **(c)**. DNA  
1141 from nullisomic-tetrasomic lines of Chinese Spring wheat were used as templates for PCR  
1142 amplification in all of these experiments. Electrophoresis of PCR products generally revealed  
1143 amplicons of the expected sizes. For these non-2DS contig anchoring tests, positive bands of  
1144 approximately equal size were amplified from both wild-type Chinese Spring and the N2D  
1145 line, while absent or polymorphic bands resulted from amplification using template DNA  
1146 from the predicted nullisomic-tetrasomic line for the corresponding chromosome. For large  
1147 misassemblies in the 2DS, positive bands were detected only for the wild-type Chinese  
1148 Spring and not for the nullisomic-tetrasomic line templates N2DT2A (N2D<sup>1</sup>) and N2DT2B  
1149 (N2D<sup>2</sup>).  
1150

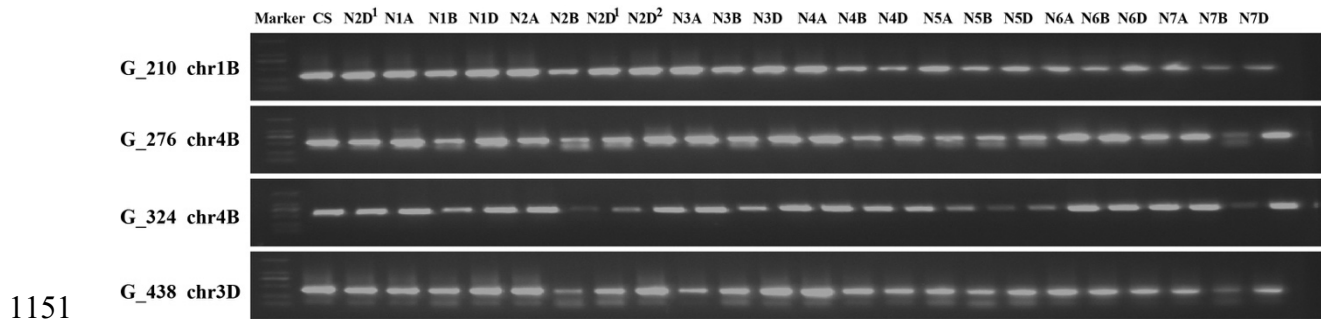

1152 **Supplemental Figure 11.** Additional chromosome anchoring experiments were performed  
1153 using a full set of nullisomic-tetrasomic lines and four primer pairs randomly selected among  
1154 non-2DS contigs indicated by previous experiments (Figure s10) to be unanchored. Wild-  
1155 type Chinese Spring was used as a control. Notably, these experiments do not indicate  
1156 anchoring to any chromosome, suggesting that the unanchored contigs or large misassemblies  
1157 were not anchored due to nonspecific primers.

1158



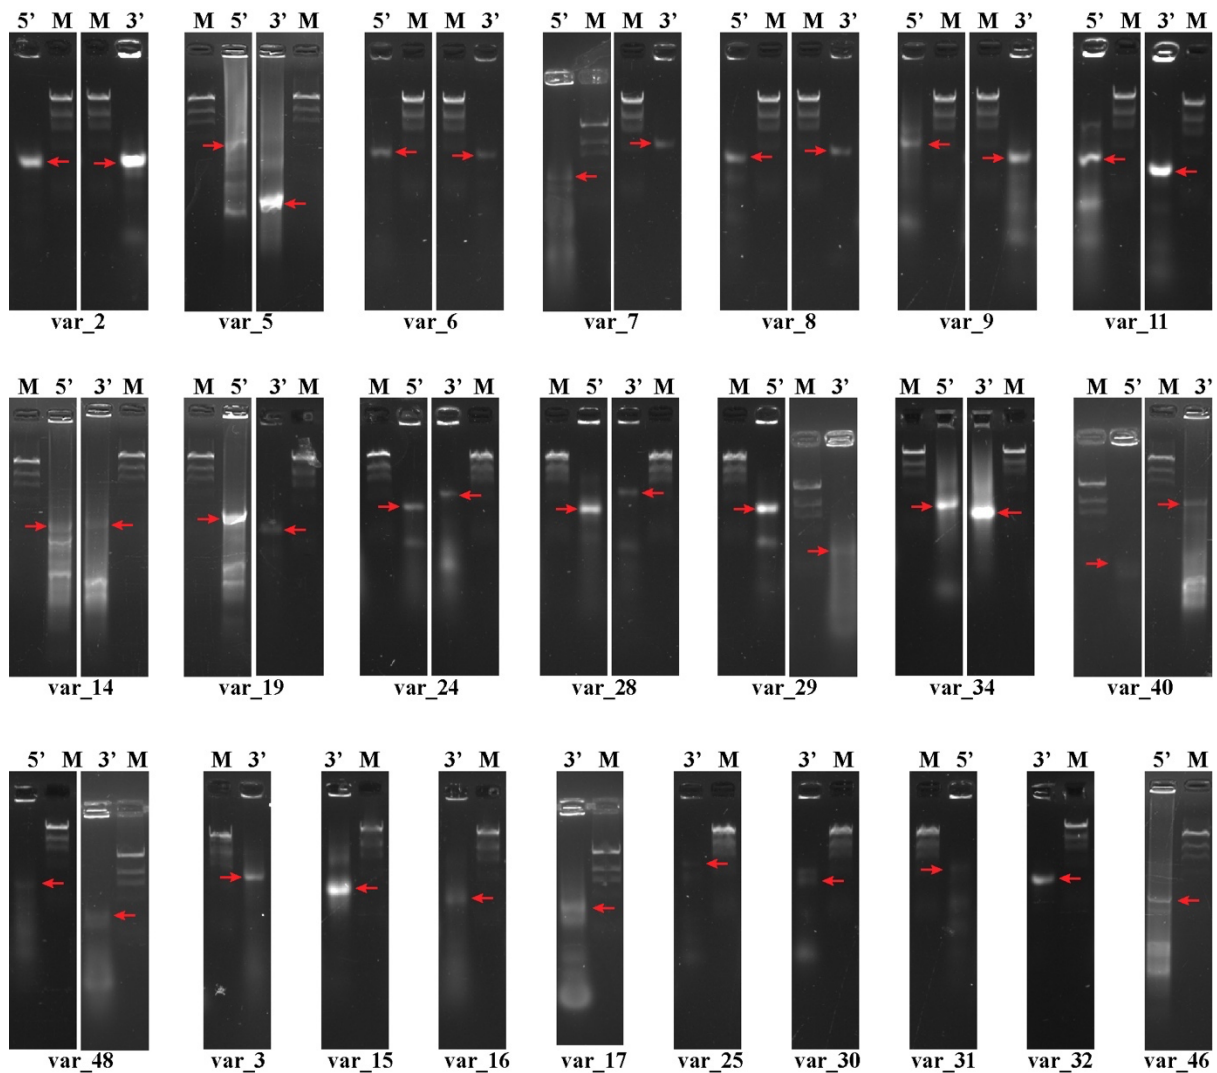

1159

1160

1161

1162

1163

1164

**Supplemental Figure 12.** Long-range amplification results surrounding the boundaries of 2DS large misassemblies by using a DNA sample from Chinese Spring as a template. The PCR products were evaluated by electrophoresis analysis. The red arrows indicate the bands with the same size as those predicted from our assembly.

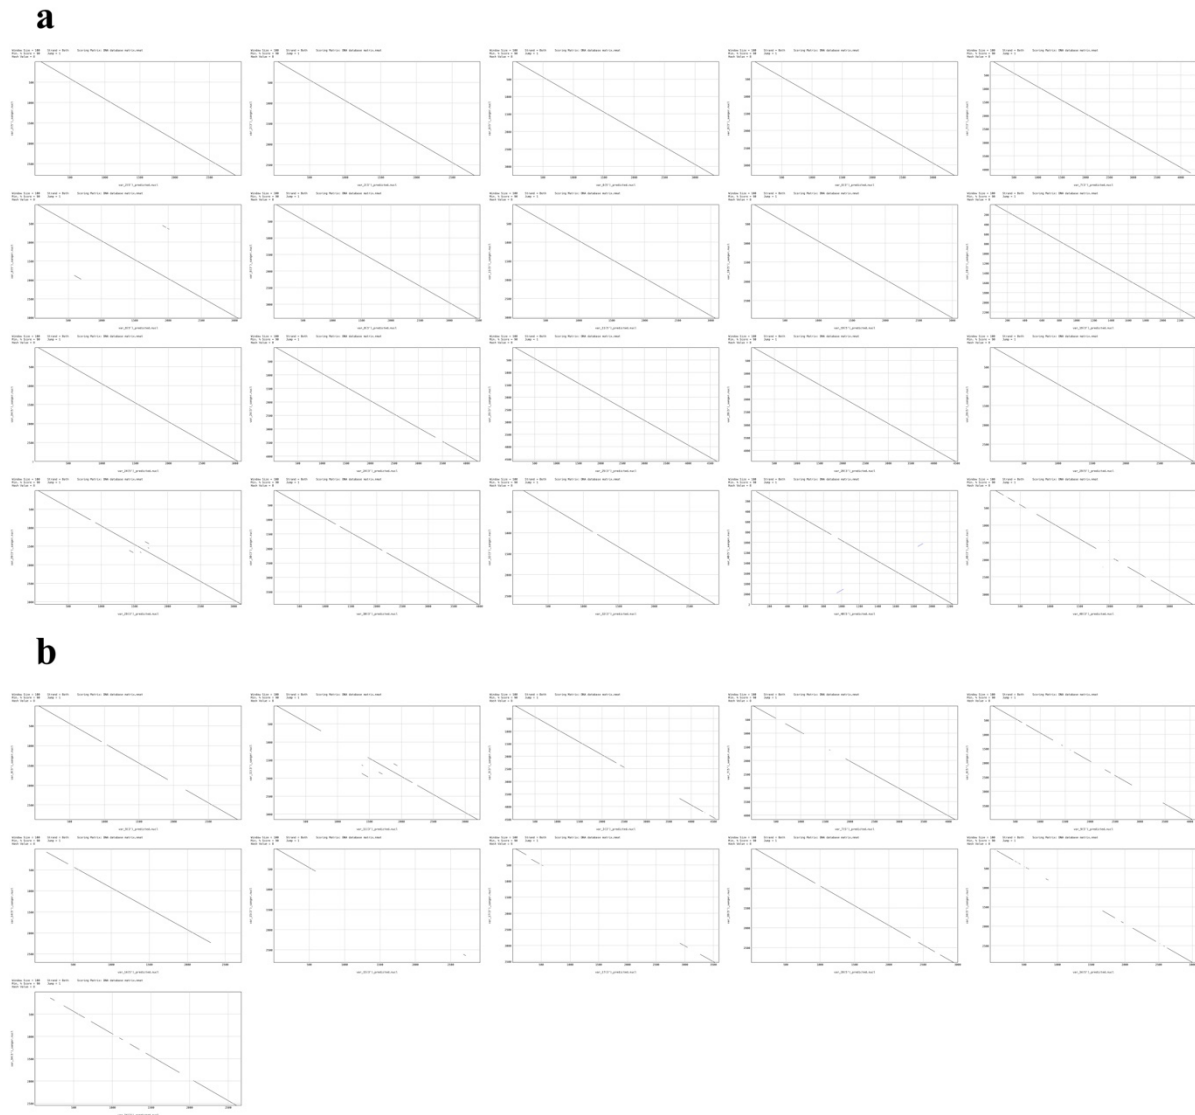

1165

1166 **Supplemental Figure 13.** Dot-plot visualizations for Sanger sequencing results of target

1167 bands from long-range amplification (Figure s12) to the products predicted from our

1168 assembly: **(a)** Comparison of bands that were sequenced successfully; **(b)** comparison of

1169 bands with some portions not sequenced successfully.

1170

1171 **Supplemental Material 1.** The NODE unitigs of each primary pool are provided in FASTA  
1172 format.

1173 **Supplemental Material 2.** Genome connection chains for BAC sequences.

1174 The files from 'P1.txt' to 'P60.txt' correspond to the 60 primary pools. Each file contains  
1175 genome connection chains of all BAC sequences from a given primary pool. Genome chains  
1176 are represented in a format similar to FASTA, with a description line such as '>BAC\_1\_1'  
1177 that states the name of the BAC sequence, followed by tab-delimited lines to define attributes  
1178 of the connected unitigs, including serial number,  $k$ -mer based length, orientation, coverage,  
1179 repeat status (a placeholder reserved for use in the future), overlap length and distance to  
1180 adjacent unitigs.

1181 **Supplemental Material 3.** The assembled BAC sequences are provided in FASTA format.

1182 **Supplemental Material 4.** The assembled chromosome-scale contig sequences are provided  
1183 in FASTA format.

1184 **Supplemental Material 5.** Gene model sequences are provided in FASTA format.

1185 **Supplemental Material 6.** Summary of comparison to IWGSC RefSeq v2.0.

1186 RefSeq has been improved with the v2.0 update, which utilizes WGS PacBio reads and  
1187 genome optical mapping (<http://www.wheatgenome.org/>). In RefSeq v2.0, a large number of  
1188 misassemblies and gaps were revised, resulting in a reduction in gaps by 61% in the 2DS  
1189 portion (with 4,053 gaps remaining). In accordance with the Toronto agreement for pre-  
1190 publication data sharing, comprehensive details of comparisons between our assembly and

1191 RefSeq v2.0 are not provided. Rather, we highlight and summarize a few noteworthy results  
1192 from these comparisons.

1193 Most notable are revisions to large structural misassemblies from RefSeq v1.0. Of 37  
1194 insertions, two were filled completely, while an additional 27 were partially filled or revised  
1195 for improved accuracy in estimated gap size. As shown in the sample figures below, most of  
1196 these updates are consistent with our assembly, thus providing independent evidence that our  
1197 assembly workflow and resulting contigs are of high accuracy. Moreover, the T48 contig  
1198 sequence (351 kb), which was unanchored in RefSeq v1.0, could be partially aligned to the  
1199 22.0-22.3 Mb region of the 2D chromosome in RefSeq v2.0. This result is consistent with the  
1200 preliminarily identified location of the contig within the 20,8795-20,833 kb region of the 2D  
1201 chromosome in RefSeq v1.0, determined using the physical map. In addition, all three  
1202 inversions were completely corrected in RefSeq v2.0.

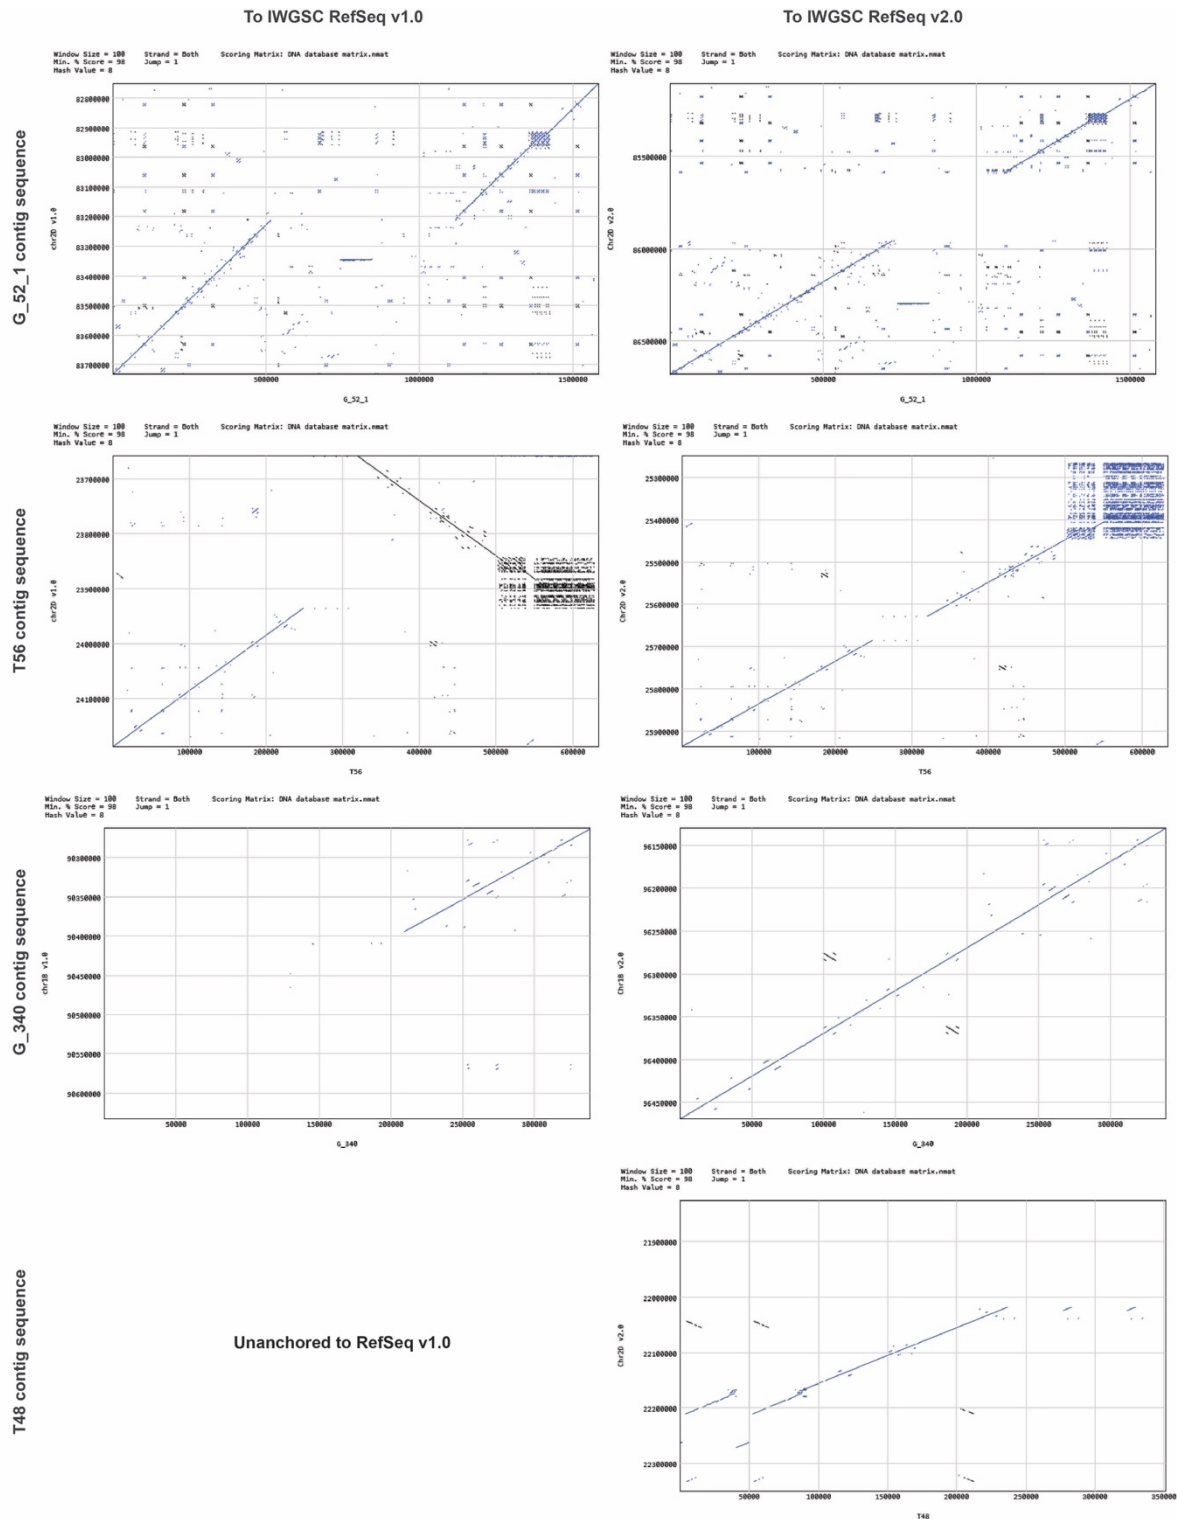

1203

1204 Our assembly features two large structural differences relative to RefSeq v2.0, which do

1205 not appear in comparison to RefSeq v1.0. These differences are located on chromosomes 2D

1206 and 1B. An inconsistency associated with a large segment (3.2 Mb) can be observed by dot-

1207 plot visualization of the G\_142 contig sequence against the 2D chromosome reference  
1208 sequences. This segment was relocated from the 268.0-271.2 Mb portion of Chr2D in RefSeq  
1209 v1.0 to 260.4-263.7 Mb in RefSeq v2.0. As illustrated by the figures shown below, both our  
1210 assembly and the pan-genome comparisons support the chromosome structure represented in  
1211 RefSeq v1.0. Pan-genomic analysis was undertaken to characterize the collinearity of the  
1212 G\_142 contig sequence to corresponding portions of 10 wheat germplasms  
1213 (<http://www.10wheatgenomes.com>), in addition to both RefSeq v1.0 and v2.0. These results  
1214 indicate strong collinearity between G\_142 and all samples except for RefSeq v2.0, for which  
1215 relatively little collinearity was observed for the translocated portion.

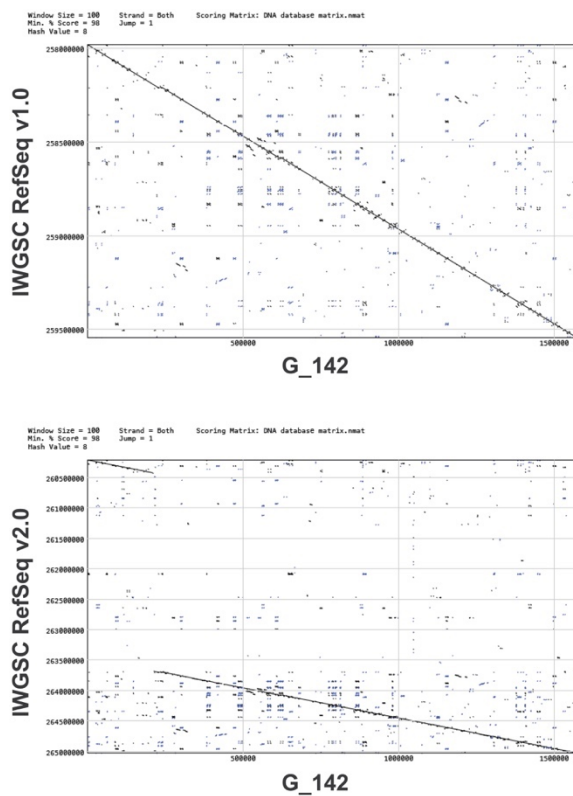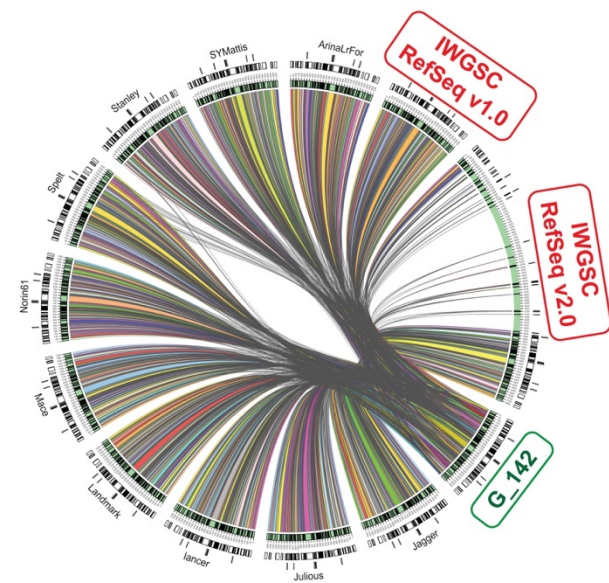

1216  
1217 Upon integration of RefSeq v2.0 with our chromosome-scale contig sequences, a total of  
1218 3,632 gaps of the 2DS portion were filled completely, while 421 gaps remained unfilled.

1219 **Supplemental Material 7.** Cost estimation and comparison to popular workflows.

1220 Two examples are provided for comparison of estimated costs for our pooled hybrid  
1221 sequencing design and Lamp assembler to other assembly workflows. The first example  
1222 provides cost estimates for producing a reference sequence for a bread wheat germplasm  
1223 other than Chinese Spring, while the second provides an estimate for simultaneous  
1224 sequencing of multiple samples with relatively simple genome structures.

1225 We first demonstrate the potential for application of our workflow towards producing a  
1226 reference sequence for a bread wheat germplasm. To this end, two BAC libraries were  
1227 constructed, each of which was composed of 250k clones with an average insert size of 150  
1228 kb. A total of 300k clones were sequenced to produce gapless BAC sequences covering the  
1229 genome with 3× coverage. These BAC sequences were further assembled to chromosome-  
1230 scale contigs with an expected average length exceeding 1.0 Mb. Contigs were anchored to  
1231 an optical map, and their positions and relative distances were determined. Gaps were closed  
1232 either by using consensus sequences of PacBio reads or by selective sequencing of clones  
1233 from the un-sequenced portion of the BAC library.

1234 To apply an assembly workflow similar to that used for the IWGSC RefSeq assembly,  
1235 the initial chromosome-scale scaffolds were assembled from WGS short reads using either  
1236 DeNovoMagic or TRITEX. Misassemblies were revised using WGP tags of BAC clones that  
1237 were produced by a series of methods, including chromosome sorting, construction of  
1238 chromosome-specific BAC libraries, and finally WGP tag sequencing. Several remaining  
1239 misassemblies were further corrected by optical mapping. Gaps were filled by the filling step  
1240 of our workflow, with a potential tenfold increase in costs resulting from the significantly

1241 increased number of gaps, as shown in the paper. The details of these comparisons are listed  
 1242 in the table below.

| Item                                                                             | Estimated experimental costs (\$) for assembling the reference genome of a wheat germplasm by |                                     |
|----------------------------------------------------------------------------------|-----------------------------------------------------------------------------------------------|-------------------------------------|
|                                                                                  | our workflow                                                                                  | a workflow as used for IWGSC RefSeq |
| 2× 250k whole-genome BAC libraries (\$0.15 for each clone)                       | 75,000                                                                                        | 0                                   |
| 300k BAC sequencing (\$5 for each clone)                                         | 1,500,000                                                                                     | 0                                   |
| 1,600 Gb whole-genome SMRT sequencing (20 Sequel II SMRT Cells, \$3000 for each) | 60,000                                                                                        | 60,000                              |
| Whole-genome Illumina sequencing (paired-ends and mate-pairs)                    | 0                                                                                             | 30,000                              |
| Sorting of all 21 chromosomes (\$50,000 for each)                                | 0                                                                                             | 1,050,000                           |
| 21 chromosome-specific BAC libraries (\$10,000 for each)                         | 0                                                                                             | 210,000                             |
| WGP for chromosome-specific libraries (\$150,000 for each)                       | 0                                                                                             | 3,150,000                           |
| Genome optical map                                                               | 100,000                                                                                       | 100,000                             |
| Correction of misassemblies and gaps                                             | 150,000                                                                                       | 1,500,000                           |
| <b>Total</b>                                                                     | <b>1,885,000</b>                                                                              | <b>6,100,000</b>                    |

1243 For the second example, we demonstrate the potential use of our workflow for  
 1244 assembling reference sequences for samples including 20 bacterial strains (each of ~5 Mb in  
 1245 genome size), three monokaryon fungal strains (~50 Mb each) and a rice germplasm (~450  
 1246 Mb). The Lamp assembler can be applied to sequence data produced by various workflows,



1247 as illustrated by this example. For each sample, a PE sequencing library with an average  
1248 insert size of 350 bp was constructed, yielding short reads of approximately 1,000× genome  
1249 coverage. A super pool was produced by mixing DNA solutions according to the desired  
1250 coverage of long reads for each sample (80× for bacterial genomes, 130× for fungal and rice  
1251 genomes). Long-read sequencing was performed using a single SMRT Cell on the Sequel II  
1252 platform, which is expected to be sufficient for the super pool since a single SMRT Cell  
1253 could be guaranteed by the service provider to have a minimum throughput of 80 Gb. For rice  
1254 sequencing, contigs were joined to the chromosome-scale scaffold by optical mapping, and  
1255 the few remaining gaps could be filled by assembly of at most 500 selected BAC clones.

1256 Long-read-based non-hybrid assembly workflows have emerged as a common method in  
1257 recently published studies. We estimated that up to four bacterial strains could be pooled  
1258 together for high-coverage assembly using the sequencing results from a single SMRT Cell  
1259 on the original Sequel platform. Each fungal strain was sequenced using an individual SMRT  
1260 Cell on the original Sequel platform, while the rice germplasm was sequenced using one  
1261 SMRT Cell on the Sequel II platform. Corrections of misassemblies can require dramatically  
1262 increased costs relative to the initial assembly, as described in this paper. We estimate a  
1263 threefold increase in cost associated with misassembly correction in our workflow. Details of  
1264 our estimated cost comparisons across sequencing workflows are provided in the table below.

1265

1266

1267

| Samples                                              | Workflows co-operated<br>with Lamp assembler | Non-hybrid workflows                        |
|------------------------------------------------------|----------------------------------------------|---------------------------------------------|
|                                                      | Costs (\$) for PacBio sequencing             |                                             |
| 20 bacterial strains                                 |                                              | 7,500<br>(1 Sequel SMRT Cell per 4 strains) |
| 3 fungal strains                                     | 3,000<br>(1 Sequel II SMRT Cell)             | 4,500<br>(1 Sequel SMRT Cell per strain)    |
| 1 rice germplasm                                     |                                              | 3,000<br>(1 Sequel II SMRT Cell)            |
| Costs (\$) for Illumina sequencing (paired-end)      |                                              |                                             |
| 20 bacterial strains                                 | 1,500<br>(75 for each strain)                |                                             |
| 3 fungal strains                                     | 1,200<br>(400 for each strain)               | 0                                           |
| 1 rice germplasm                                     | 2,600                                        |                                             |
| Costs (\$) for correction of mis-assemblies and gaps |                                              |                                             |
| 20 bacterial strains                                 | 0                                            | 0                                           |
| 3 fungal strains                                     | 0                                            | 4,500 (1,500 for each)                      |
| 1 rice germplasm                                     | 5,000                                        | 15,000                                      |
| <b>Total</b>                                         | <b>13,300</b>                                | <b>34,500</b>                               |

1268 **Supplemental Material 8.** Details for construction of the 2DS-specific BAC library

1269 *Plant material*

1270 Seeds of the double ditelosomic line of hexaploid *Triticum aestivum* L. cv. ('Chinese

1271 Spring' wheat) ( $2n = 20'' + t''2DS + t''2DL$ ) carrying the short and long arms of chromosome

1272 2D in the form of telosomes were provided by Professor Adam J. Lukaszewski (University of

1273 California, Riverside, USA). The seeds were germinated in the dark at  $25 \pm 0.5$  °C on

1274 moistened filter paper for 3 days to produce roots that were 2-3 cm in length. A total of 5,773  
1275 seeds were germinated in batches of 25-30 for the preparation of a total of 214 samples of  
1276 suspensions of mitotic metaphase chromosomes.

1277 *Preparation of chromosome suspensions*

1278 Mitotic chromosomes were isolated from synchronized root tip cells. Cycling root tip  
1279 cells were first accumulated at the G1-S interphase by incubation of seedling root tips in 2  
1280 mM hydroxyurea at  $25 \pm 0.5$  °C for 18 h. Samples were subsequently transferred to  
1281 Hoagland's solution and incubated for 5.5 h to recover from the hydroxyurea-mediated  
1282 blockage of cell cycle progression. Next, mitotic cells were arrested in metaphase by  
1283 incubation in 2.5  $\mu$ M aminophosphomethyl for two h, followed by overnight ice-water  
1284 treatment. Synchronized root tips were fixed in 2% (v/v) formaldehyde and Tris buffer  
1285 solution at 5 °C for 20 min and then washed three times in Tris buffer, with each of the three  
1286 washing steps performed for 5 min at 5 °C. Root tips were excised at 1 mm from the tip, and  
1287 chromosomes were released by homogenization in 1 mL of LB01 nuclear lysis buffer using a  
1288 Polytron PT1300D homogenizer (Kinematica AG, Littau, Switzerland) at 20,000 rpm for 13  
1289 s. Crude suspensions were filtered through a 50- $\mu$ m pore nylon mesh to remove large tissue  
1290 fragments.

1291 *Flow cytometric analysis and sorting*

1292 Chromosome analysis and sorting were performed on a FACSVantage flow cytometer  
1293 (Becton Dickinson, San José, USA) equipped with an argon-ion laser configured for  
1294 multiline UV emission with an output power of 300 mW. A solution of 50 mM NaCl was

1295 used as the sheath fluid. Chromosome suspensions were stained with 4',6-diamidino-2-  
1296 phenylindole (DAPI) at a final concentration of 2  $\mu\text{g}/\text{mL}$ , filtered through a 20- $\mu\text{m}$  pore size  
1297 nylon mesh and analysed at rates of 200-400 particles per second. DAPI fluorescence was  
1298 measured using a fluorescence 1 (FL1) detector with a 424/44 bandpass filter. The relative  
1299 fluorescence intensities of each chromosome suspension were recorded and plotted to  
1300 produce histograms of the FL1 pulse area (FL1-A).

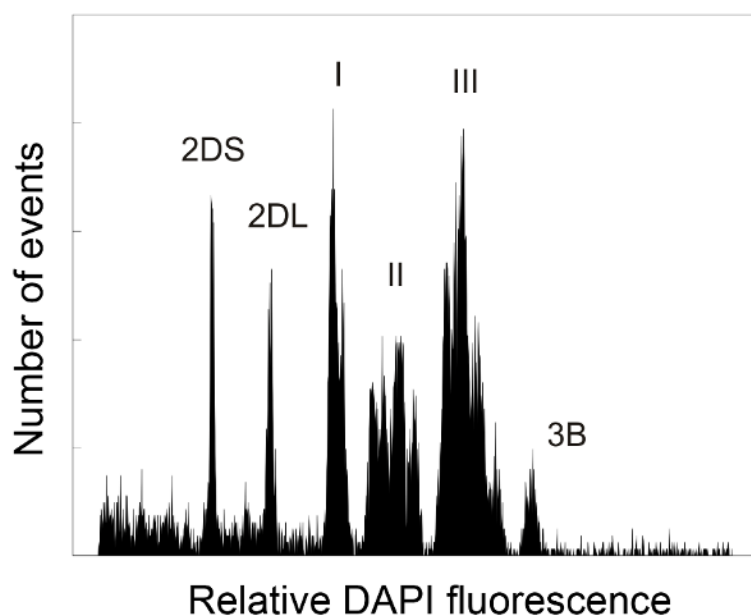

1301  
1302 **Figure legend.** Histogram of relative fluorescence intensity (flow karyotype) obtained after  
1303 the analysis of DAPI-stained mitotic metaphase chromosomes isolated from the double  
1304 ditelosomic line of hexaploid wheat *Triticum aestivum* L. cv. Chinese Spring ( $2n = 20'' +$   
1305  $t''2DS + t''2DL$ ), which carries the short and long arms of chromosome 2D in the form of  
1306 telosomes 2DS and 2DL. The flow karyotype consists of a peak representing chromosome  
1307 3B, three clusters of peaks representing groups of chromosomes (I, II and III), and two peaks  
1308 representing arms of chromosome 2D, which could be clearly distinguished, enabling  
1309 isolation of the 2DS.

1310 For chromosome sorting, gates were set on a dot-plot of FL1-A versus FL1 pulse width  
1311 (FL1-W), and 2DS chromosomes were sorted at rates of 5-10 telosomes per second. A total  
1312 of 7,750,000 2DS telosomes, corresponding to ~5  $\mu\text{g}$  of DNA, were flow-sorted in aliquots of  
1313  $\sim 1.0 \times 10^5$  into 160  $\mu\text{L}$  of  $1.5 \times$  IB buffer. The identities and purities of the sorted  
1314 chromosomes were determined microscopically after isolation via double FISH with probes  
1315 for Afa and telomeric repeats. The average purity of sorted fractions was 88.26%, and the  
1316 2DS fractions were contaminated by a mix of other chromosomes, chromatids and  
1317 chromosome arms.

#### 1318 *Preparation of high-molecular-weight (HMW) DNA*

1319 Flow-sorted chromosomes were pelleted at  $200 \times g$  for 30 min at  $4^\circ\text{C}$  and resuspended in  
1320 7.5  $\mu\text{L}$  of  $1 \times$  IB at  $50^\circ\text{C}$ . Then, the samples were mixed with 4.5  $\mu\text{L}$  of prewarmed 2%  
1321 InCert low-melting-point agarose (GTG) in  $1 \times$  IB. The mixture was poured into an 80- $\mu\text{L}$   
1322 plug mould to form an agarose miniplug. The quality of HMW DNA was evaluated by  
1323 pulsed-field gel electrophoresis (PFGE).

#### 1324 *Partial digestion, size selection and recovery of HMW DNA*

1325 Agarose miniplugs were washed twice for 1 h in 10:10 TE buffer (10 mM Tris, 10 mM  
1326 EDTA). Subsequently, they were equilibrated on ice for 1 h in 10 mL of  $1 \times$  *Hind*III buffer  
1327 (Invitrogen) supplemented with 4 mM spermidine, 1 mM DTT and 0.1 mg/mL BSA. Partial  
1328 *Hind*III digestion was performed for three 2DS miniplugs at a time, each using 6 conditions  
1329 of *Hind*III enzyme concentration (0.02, 0.03, 0.05, 0.1, 0.2, and 1 units/tube) in 1 mL of  
1330 buffer, incubated for 20 min at  $37^\circ\text{C}$ . The samples were transferred to an ice bath, and

1331 digestion was terminated by the addition of 200  $\mu$ L of 0.5 M EDTA stock solution at pH 8.0  
1332 and incubation of the resulting mixture for 30 min. Partially digested DNA was size-selected  
1333 by PFGE with a 1% Gold SeaKem agarose (GTG) gel at 6 V/cm and 12  $^{\circ}$ C in 0.25 $\times$  TBE for  
1334 14 h, with a 1.0 to 50 s switching interval and an angle of 120 $^{\circ}$ . After electrophoresis, the  
1335 edges of the gel containing size markers were excised and stained with ethidium bromide.  
1336 Five regions of the gel (100-150, 150-200 and 200-250 kb) were excised and equilibrated  
1337 with 1.3 $\times$  TAE buffer twice for 1 h each. The size-selected DNA was isolated by  
1338 electroelution in 1.3 $\times$  TAE using a BioRad Electroelution system (Model 422). The optimum  
1339 electroelution (electrophoresis) time for concentrating the partially digested DNA in the  
1340 lower-39  $\mu$ L fraction, directly on the membrane CAPS, was determined by conducting  
1341 several electrophoresis monitoring experiments with whole genomic DNA eluted over a  
1342 range of run times. The DNA concentration was estimated in 1% normal agarose gels using 5  
1343  $\mu$ L of electroeluted DNA and a dilution series of *Hind*III-digested lambda DNA as a  
1344 standard.

#### 1345 *Ligation and transformation*

1346 The complete remaining DNA fraction (approx. 33  $\mu$ L) was ligated at 16  $^{\circ}$ C overnight in  
1347 a 50- $\mu$ L reaction with 4 units of T4 DNA ligase (Invitrogen) and 4 ng of pIndigoBAC  
1348 *Hind*III Cloning Ready vector (Epicentre) prepared for high-efficiency cloning by digestion  
1349 with *Hind*III. The ligation mix was incubated at 4  $^{\circ}$ C for 90 min. Fifteen microlitres of the  
1350 resulting ligation was added to 110  $\mu$ L of MegaX DH10B T1 electrocompetent cells, which  
1351 were then incubated at room temperature for 5 min. The incubated mixture was divided into  
1352 15- $\mu$ L aliquots, each of which was electroporated using a Gibco BRL Cell-Porator System

1353 (Life Technologies) with the following settings: 350 V, 330  $\mu$ F capacitance, low ohm  
1354 impedance, fast charge rate, and 4 k $\Omega$  resistance. The electroporation solutions were pooled  
1355 in a tube containing 3 mL of recovery media and incubated for 60 min at 37 °C and 175 rpm  
1356 on an orbital shaker. Aliquots of the recovery media with recombinant cells were plated on  
1357 LB plates containing 12.5  $\mu$ g/mL chloramphenicol, 50  $\mu$ g/mL X-Gal and 25  $\mu$ g/mL IPTG.  
1358 The plates were incubated at 37 °C overnight. A Q-bot (Genetix) was used to identify  
1359 recombinant colonies by their white phenotype, and these colonies were picked and used to  
1360 inoculate wells of 384-well plates containing 90  $\mu$ L of LB freezing buffer (Peterson *et al.*  
1361 2000). The plates were incubated overnight at 37 °C, triplicated and stored at –80 °C. The  
1362 complete 2DS-specific BAC library (code TaaCsp2DShA) comprises 43,008 clones ordered  
1363 in 112 384-well plates.

#### 1364 *Isolation of BAC DNA and insert analysis*

1365 Individual BAC clones were cultured overnight in deep 96-well plates with wells  
1366 containing 1.5 mL of LB supplemented with 12.5  $\mu$ g/mL chloramphenicol. BAC DNAs were  
1367 isolated and digested to completion with *NotI*. DNA fragments were size-separated by PFGE  
1368 in a 1% Gold SeaKem agarose (GTG) gel at 6 V/cm, with a 1-15 s switch time ramp and an  
1369 angle of 120°, for 14 h at 14.0 °C in 0.25 $\times$  TBE buffer. Analysis of 120 BAC clones  
1370 indicated that the 2DS BAC library had an average insert size of 132 kb. Almost two-thirds  
1371 of the 2DS library (62.5%, in plate Nos. 1-70) was constructed from a fraction with an  
1372 average insert size of 126 kb. The second fraction of clones used for the 2DS library  
1373 construction (37.5%, in plate Nos. 71-112) had a greater average insert size of 142 kb.

1374 *Coverage and specificity of the BAC library*

1375       The coverage for 2DS was estimated as  $15.6\times$  based on the average insert size, the total  
1376 number of clones and an 11.74% rate of contamination by other chromosomes. The total size  
1377 of 2DS was calculated to be 316 Mb based on the relative length of 2DS (1.86%) compared  
1378 to the nuclear genome size of common wheat (16,974 Mb/1C). Accounting for the size of  
1379 2DS and the 11.74% rate of contamination by undesired chromosomes in the 2DS library, the  
1380 probability of a given DNA sequence in the library originating from 2DS was determined to  
1381 be 99.6%.

1382
